1 *Type of the Paper: Research Article*

2

3 **Identification of Japanese Encephalitis Virus Genotype V and Other Mosquito-borne**  
4 **Viruses in Camp Humphreys, Republic of Korea, using Metagenomic Analysis**

5 Mark A. Sanborn<sup>1</sup>\*, Kathryn McGuckin Wuertz<sup>1</sup>\*, Heung-Chul Kim<sup>2</sup>, Yu Yang<sup>1</sup>, Tao Li<sup>1</sup>, Simon  
6 D. Pollett<sup>1</sup>, Richard G. Jarman<sup>1</sup>, Irina Maljkovic Berry<sup>1</sup>, Terry A. Klein<sup>2</sup>, Jun Hang<sup>1</sup>

7

8 <sup>1</sup> Viral Diseases Branch, Walter Reed Army Institute for Research, Silver Spring, Maryland,  
9 USA;

10 <sup>2</sup> Force Health Protection and Preventive Medicine, MEDDAC-Korea/65th Medical Brigade,  
11 Unit 15281, APO AP 96271-5281, USA

12

13 \* These authors made equal contributions

14

15 Correspondence: Jun.hang.civ@mail.mil; Tel. +1-301-319-9519

16

17 **ABSTRACT**

18 Recent outbreaks of emerging and re-emerging viruses such as Zika, West Nile and Japanese  
19 encephalitis (JEV) viruses have shown that timely detection of novel arboviruses with epidemic  
20 potential is essential to mitigate human health risks. There have been rising concerns that an  
21 emergent JEV genotype (genotype V, GV) is circulating in Asia, against which the current US-  
22 FDA-approved JEV vaccine may not be efficacious. To ascertain if JEV GV and other  
23 arboviruses are circulating in East Asia, we conducted next-generation sequencing on 260 pools  
24 of *Culex tritaeniorhynchus* and *Culex bitaeniorhynchus* mosquitoes (6,540 specimens) collected  
25 at Camp Humphreys, Republic of Korea (ROK), from mid-May - October 2018. Metagenomic  
26 analysis demonstrated a highly abundant and diverse virome with correlates of health and  
27 ecological relevance. Additionally, two complete JEV GV genome sequences were obtained from  
28 separate mosquito pools, indicating that JEV GV is circulating in the Pyeongtaek area near Seoul,  
29 ROK. Retrospective sample and sequence analyses showed that JEV GV was also present in  
30 2016 mosquito pools collected in Seoul, ROK. Sequence-based analysis of JEV GV indicates a  
31 divergent genotype that is the most distant from the GIII derived live attenuated SA14-14-2  
32 vaccine strain. A GV E protein investigation and 3D modeling in context to SA14-14-2 indicated  
33 likely regions responsible for reduced antibody affinity, including clusters of significant amino  
34 acid changes at externally exposed domains. These data highlight the critical need for continued  
35 mosquito surveillance as a means of detecting and identifying emerging and re-emerging  
36 arboviruses of public health relevance. Importantly, our results emphasize recent concerns that  
37 there may be a possible shift in the circulating JEV genotype in East Asia and highlights the  
38 critical need for a vaccine proven to be efficacious against this re-emergent virus.

39

## 40 INTRODUCTION

41           There has been a dramatic increase in emerging and re-emerging viruses of public health  
42 significance, particularly from mosquito-borne arboviruses such as dengue, Zika, West Nile  
43 (WNV), chikungunya, and Japanese encephalitis (JEV) viruses (1). Mosquitoes represent a  
44 substantial and mostly unexplored virus reservoir of health and ecological relevance. Arboviruses  
45 are responsible for roughly 30% of emerging human viruses in recent years (2), and mosquitoes  
46 vector plant viruses and are host to insect-specific viruses at extremely high rates (3). The highly  
47 pervasive and diverse nature of mosquito viromes makes them hotbeds of virus genetic exchange  
48 and evolution and offers observable ecological correlates. Combining routine surveillance with  
49 unbiased next-generation sequencing (NGS) of mosquitoes is a highly effective approach for  
50 detecting novel viruses and allows for critical insight into the nature of emerging and re-emerging  
51 pathogens circulating in vector populations (4-9).

52           JEV is of great concern due to its severe morbidity and mortality and its continued  
53 increase in global distribution. JEV was first isolated in a US service member deployed to Japan  
54 in 1935 (10, 11). The geographical distribution now includes 24 countries in Southeast Asia and  
55 is the leading cause of tropical viral diseases affecting an estimated 68,000 people per year (12,  
56 13). JEV imposes a high global disease burden (11, 13, 14), with a case fatality of up to 25% of  
57 persons demonstrating disease symptoms and with an estimated 50% of persons who survive that  
58 exhibit permanent neurological damage, including cognitive dysfunction and neurological  
59 deficits (15-19) (13, 20). Although human infections are currently restricted to the eastern  
60 hemisphere, JEV genetic material has been identified in mosquitoes and birds in northern Italy,

61 indicating the critical need for surveillance to identify the early emergence of JEV into new  
62 geographic locals to prevent the spread of the disease (12).

63         There are rising concerns regarding a potential genotype shift in the predominant JEV  
64 strain circulating in Southeast Asia from genotype I (GI) to genotype V (GV) (5, 6, 21). This is a  
65 significant global health concern, as the currently available vaccines have limited reported  
66 efficacy against JEV GV (12, 22). JEV GV was first identified in 1952 in Malaysia and was not  
67 reported again until it re-emerged 57 years later, where it was detected in *Culex tritaeniorhynchus*  
68 mosquitoes from China in 2009 (23). Within the Republic of Korea (ROK), JEV GV was first  
69 detected in *Culex bitaeniorhynchus* mosquitoes, collected from Daeseongdong (a village in  
70 northern Gyeonggi province located in the demilitarized zone) in 2010, with subsequent detection  
71 in *Culex orientalis* and *Culex pipiens* collected in the Gangwon and Gyeonggi provinces (9, 24).  
72 Recently, JEV GV has been reported in clinical cases in the ROK (25).

73         For this study, we conducted metagenomics-based sequencing of mosquito vectors in the  
74 ROK and leveraged our data to make novel virological and ecological insights. By interrogating  
75 the data, we uncovered highly abundant and diverse viromes and leveraged statistical analyses to  
76 uncover temporal and virus-specific correlations. Additionally, we described our discovery of  
77 JEV GV in the context of virome and entomological observations and performed sequence-based  
78 analysis that supports the potential for GV vaccine escape.

## 79 **MATERIALS AND METHODS**

### 80 **Sample collection.**

81 Mosquitoes were collected using New Jersey light traps or Mosquito Magnets®  
82 (Woodstream Corp., Lititz, PA, USA) at Camp Humphreys US Army Garrison. The mosquitoes  
83 were identified morphologically using standard keys (26) and pooled (1-39 individuals per pool)  
84 by species and collection site and date. The mosquito pools were maintained at -80 °C or on dry  
85 ice until processed.

#### 86 **Viral nucleic acid extraction.**

87 Mosquito pools and viral culture media were combined in bead-beating tubes containing  
88 glass beads and homogenized using a Mini-BeadBeater 16 (Bio Spec Products Inc., Bartlesville,  
89 OK, USA). The homogenates were cleared by centrifugation and the clear supernatants were  
90 subjected to nucleic acid digestion with DNase-1, RNase, and Benzonase. The digest was subject  
91 to viral nucleic acid extraction using a MagMAX™ Pathogen RNA/DNA Kit on the  
92 KingFisher™ Flex Purification System (Thermo Fisher Scientific, Waltham, MA, USA) in a 96  
93 deep-well configuration.

#### 94 **Random amplification and next-generation sequencing (NGS).**

95 The nucleic acid extracts were treated with DNase-1 prior to a three-step random  
96 amplification as described previously (27). Briefly, anchored degenerate octamer primers were  
97 annealed with a 65°C to 4°C incubation followed by first-strand synthesis with SuperScript™ III  
98 (Thermo Fisher Scientific) and 33 cycles of polymerase chain reaction with Platinum® Taq DNA  
99 Polymerase (Thermo Fisher Scientific) and anchor specific primers. Amplicon quality was  
100 verified and quantitated prior to library preparation, using the Agilent 4200 TapeStation system  
101 and D5000 Screen Tape (Santa Clara, CA, USA). Sequencing libraries were constructed using  
102 Nextera® XT DNA Library Preparation Kits and 96 well v2 indexes (Illumina, San Diego, CA,  
103 USA). The libraries were quality checked using an Agilent 4200 TapeStation and pooled at

104 equimolar concentrations. Sequencing was performed on an Illumina Miseq system with the 600  
105 cycle v3 Reagent Kit.

### 106 **Sequence-based pathogen discovery.**

107       The raw paired-end fastq output was processed through an in-house Pathogen Discovery  
108 pipeline (28) and the reads were quality evaluated with FastQC  
109 (<https://www.bioinformatics.babraham.ac.uk/projects/fastqc/>) and trimmed using cutadapt v1.16  
110 (29) and prinseq-lite v0.20.3 (30). The quality reads were then assembled into contigs with Ray  
111 Meta (31) and extended using Cap3 (32). The contigs then underwent iterative BLAST searching  
112 with megablast, discontinuous megablast, and blastx against local NCBI nucleotide (nt) and non-  
113 redundant protein databases. The viral sequences assembled and identified by this pipeline were  
114 verified using our NGS mapper pipeline ([https://github.com/VDBWRAIR/ngs\\_mapper](https://github.com/VDBWRAIR/ngs_mapper)), which  
115 includes data preprocessing followed by reference-based assembly using BWA MEM  
116 (<https://arxiv.org/abs/1303.3997v2>) and outputs assembly statistics and visuals. *De novo*  
117 assembled contigs were used as the mapping reference in this pipeline. In addition to screening  
118 for assembly errors (e.g., chimeric assembly), sequences published in this study underwent  
119 curation involving manual per-base checking of the assemblies for sequencing errors (e.g.,  
120 incomplete trimming).

### 121 **Virome analyses.**

122       All viral and unknown contigs assembled by the Pathogen Discovery pipeline were  
123 combined with the megablast identified GenBank sequences. These sequences were clustered  
124 with CD-HIT-EST (33) at a 90% nt similarity threshold to create a cluster reference sequence set.  
125 The cluster reference sequences were then subject to local self-Blastn alignment to identify

126 chimeric sequences and redundancies missed by clustering. For incomplete reference sequences,  
127 the total contig file from all samples was mapped iteratively to them to create pseudo-genomes  
128 spanning multiple samples (only genomes supported by reads from an individual sample were  
129 published in this study). Fragmented or segmented genomes were identified using hierarchal  
130 clustering of pool positivity and similarity of Blastx-based identification. BWA MEM was used  
131 to map all sample reads to the viral sequence reference set. The resulting alignment files were  
132 analyzed with SAMtools (34) and parsed to create a data frame containing sample, sequence, and  
133 mapped read data. Correlative hierarchal clustering and Blast identity verification was used to  
134 search for redundancies in the data created from segmented viral genomes or incomplete  
135 genomes. The resulting master data frame was merged with sample metadata and used for the  
136 correlative, prevalence, and other metagenomics analyses. The pooled prevalence rates was  
137 calculated with the pooledBin module of the binGroup 2.2-1 R package (35, 36).

### 138 **JEV GV confirmation and full genome sequencing.**

139 Thirty-five primer pairs were designed for full genome targeted sequencing using the  
140 partial JEV GV genome sequence from our unbiased sequencing and the closest GenBank  
141 sequence (JF915894) available. The Fluidigm Access Array system (San Francisco, CA, USA)  
142 and SuperScript™ III One-Step RT-PCR kit with Platinum™ Taq High Fidelity polymerase  
143 (Thermo Fisher Scientific) were used for full genome amplification. Sequencing libraries were  
144 prepared with the Nextera® XT kit (Illumina, San Diego, CA, USA) and sequenced on an  
145 Illumina Miseq using the v3 600 cycle kit. The genomes were assembled from the read data and  
146 curation process as described. The genotypes were assumed by pairwise similarity to other GV  
147 published sequences and confirmed by phylogenetic analysis.

148 **JEV sequence analyses.**

149 JEV full genome sequences were obtained from ViPR (<https://www.viprbrc.org>),  
150 screened for obvious errors (e.g., indels), and trimmed to contain only the polyprotein CDS  
151 (coding sequence) region. JEV GV E gene sequences were obtained from GenBank or extracted  
152 from the full genome sequences. Sequences were aligned by MAFFT (37) and manually checked.  
153 The evolutionary models were selected with jModelTest (38) prior to building phylogenies.  
154 PhyML (39) with best of NNI or SPR tree space search, estimated base frequencies, and aLRT  
155 node support was used to construct full genome phylogenies. FigTree  
156 (<http://tree.bio.ed.ac.uk/software/figtree/>) was used in tree visualization. E gene tree construction,  
157 bootstrapping, and visualization were performed using MEGA X (40). Visualizations and  
158 genotype comparative analysis were created with custom python coding unless otherwise stated.  
159 Pervasive positive selection was tested using HyPhy v.2.0 as described by Pond et al. (41). GV E  
160 gene Shannon entropy was calculated using LANL entropy tool (<https://www.hiv.lanl.gov/>) for  
161 the alignment of all the ROK sequences.

162 **RESULTS**

163 **Unbiased sequencing of mosquitoes captured in ROK reveals diverse virome.**

164 The Force Health Protection and Preventive Medicine, MEDDAC-Korea, conducts a  
165 nationwide multi-location arthropod-borne disease surveillance program in the ROK (3) (**Figure**  
166 **1A**). For this study, mosquitoes collected from a single site, Camp Humphreys, Anjeong-ri,  
167 Pyeongtaek-si, Gyeonggi province, were analyzed due to its proximity to predominant  
168 agricultural areas in Gyeonggi province and the high-density population near Seoul, the capital



169 city (**Figure 1A**). Mosquitoes were collected over 24 weeks from mid-May (05/15/2018) to the  
170 end of October (10/31/2018), with up to 40 trap-night collections/week (mean = 31). A total of  
171 78,907 mosquitoes, predominantly comprised of *Culex bitaeniorhynchus* and *Culex*  
172 *tritaeniorhynchus*, both of which are known vectors of JEV. A subset of 6,540 *Cx.*  
173 *bitaeniorhynchus* and *Cx. tritaeniorhynchus* mosquitoes representing collection dates 06/26/2018  
174 to 10/29/2018 were selected and combined into 260 pools by species and date of collection for  
175 sequencing. *Culex tritaeniorhynchus* mosquitoes made up 163 pools (3,945 specimens) with a  
176 median pool size of 30 (range 1-36) and *Cx. bitaeniorhynchus* comprised 97 pools (2,595  
177 specimens) with a median pool size of 30 (range 1-39). cDNA libraries from each pool were  
178 sequenced using three MiSeq runs, which produced a total of  $1.45 \times 10^8$  paired-end reads for our  
179 analysis (**Figure 1B**). *De novo* assembly generated 41,899 contigs with nt lengths ranging from  
180 101 to 15,691 nt, with 1,811 contigs  $\geq 1000$  nt (**Figure 1C**). Sequences were aligned to NCBI  
181 databases,  $1.89 \times 10^7$ ,  $6.40 \times 10^6$ , and  $1.33 \times 10^5$  reads were classified into super kingdoms  
182 *Eukaryota* (non-human), viruses (known and novel), and bacteria, respectively (**Figs. 1D-1E**).  
183 Most viruses were identified as mosquito-specific viruses, plant viruses, unclassified, or  
184 uncharacterized viruses with unknown human or animal infectivity. Virus read abundance varied  
185 greatly by virus classification and by mosquito species (**Figure 1F**). *Virgaviridae* and  
186 *Sobemoviridae*, both known plant pathogens, accounted for the highest number of virus reads  
187 found in *Cx. bitaeniorhynchus* and *Cx. tritaeniorhynchus* respectively. Reads classified to known  
188 vertebrate pathogen families, e.g., *Orthomyxoviridae*, *Picornaviridae*, *Flaviviridae*, and  
189 *Bunyaviridae*, were observed at lesser amounts and in each case were more abundant in *Cx.*  
190 *bitaeniorhynchus*. We also observed reads belonging to mosquito-specific virus families in high  
191 amounts, e.g., *Rhabdoviridae* (**Figure 1F**). These data demonstrate that a wide range of potential

192 zoonotic, botanical, and human pathogens can be found in *Cx. bitaeniorhynchus* and *Cx.*  
193 *Tritaeniorhynchus* mosquitoes.

194 **Viruses are highly abundant in *Culex* populations.**

195 We identified 122 unique virus genomes by collapsing all 15,745 virus contigs within  
196 10% nt identity and by identifying segmented and fragmented genomes. The mosquito pools  
197 displayed a high rate of virus read positivity with a median rate of 5 genomes/sample (mean =  
198 5.6), while the maximally infected pool contained reads to 17 viruses. A total of 251/260 (96.5%)  
199 of the mosquito pools had reads belonging to at least one virus species, and 151 pools contained  
200 reads belonging to 5 or more virus species. We then sought to determine the rates at which  
201 individual virus species were detected in mosquito populations. Reads of the most prevalent  
202 virus, *Culex tritaeniorhynchus* rhabdovirus, were found in 157 pools. The median number of  
203 pools that individual virus genomes were detected in was two (mean = 11.3 samples/genome).  
204 Reads belonging to the 20 most abundant virus genomes were found in 15 or greater mosquito  
205 pools (**Table 1**). These virus sequences displayed high individual mosquito infection rates when  
206 estimated using binGroup v2.2-1 (35, 36). Sequences belonging to four viruses, *Culex*  
207 *tritaeniorhynchus* rhabdovirus, Hubei mosquito virus 2, Pyeongtaek *Culex* Virga-like virus, and  
208 Pyeongtaek *Culex* Bunyavirus, were estimated to have an individual mosquito infection rate of  
209 greater than 5%. *Culex tritaeniorhynchus* rhabdovirus reads, with the highest number of positive  
210 pools (n = 157), had an estimated infection of 11.2% in *Cx. tritaeniorhynchus* mosquitoes.  
211 Together, these data suggest the population of *Cx. bitaeniorhynchus* and *Cx. tritaeniorhynchus*  
212 tested were positive for at least 122 virus species and that these viruses were present at high rates.

213 **Significant coexistence of viruses.**

214 The coexistence of viruses in mosquito populations is an important consideration when  
215 predicting possible coinfections or deriving ecological and evolutionary conclusions. We  
216 observed significant co-prevalence and correlation of mosquito viruses (Pearson's  $r$ ,  $p \leq 0.05$ ) in  
217 the samples that were visualized using correlative hierarchal clustering and a double-dendrogram  
218 cluster map (**Figure 2A**). Because mosquitoes were pooled by collection date, clustering could be  
219 used as a proxy for temporal relatedness. For example, several viruses belonging to  
220 *Sobemoviridae*, a known plant-infecting family, form a large cluster. Co-prevalence of unrelated  
221 virus families was also observed, such as a tight cluster of Chaq-like, Bunyavirales, and  
222 Partitiviridae sequences (**Figure 2A**). Significant ( $p \leq 0.05$ ) positive partial correlation (i.e.,  
223 accounting for all variance) was observed for monophyletic virus pairs formed from correlative  
224 hierarchal clustering (**Table 2**) and is likely to indicate viruses coexisting in mosquito  
225 populations. Moreover, our binary representation of pool positivity allowed us to observe the  
226 relative abundance of viruses in the mosquito populations (**Figure 2B**). Relative abundance in  
227 combination with distinct hierarchal clustering by species shows that co-prevalence was highly  
228 species-dependent. Taken together, these data indicate that the coexistence of viruses is common  
229 and even unrelated viruses with differing tropism can be significantly correlated.

230 Further examination of our data showed that two mosquito pools were positive for JEV, an  
231 encephalitic arbovirus of particular significance due to the morbidity and mortality associated  
232 with infections. The two individual JEV positive pools were also positive for other viruses. In  
233 addition to JEV GV, pool A18.3208 contained sequences belonging to nine additional viruses  
234 classified as *Bunyavirales*, *Luteoviridae*, *Orthomyxoviridae*, *Rhadviridae*, *Totiviridae*, and  
235 *Virgaviridae* (**Sup. Table 1**). Pool A18.3210 had sequences belonging to 14 additional viruses

236 classified as *Bunyavirales*, *Luteoviridae*, *Orthomyxoviridae*, *Rhabdoviridae*, *Virgaviridae*, and  
237 unknown classifications (**Sup. Table 1**). These data suggest a wide range of potential co-  
238 infecting viruses in JEV positive mosquitoes.

### 239 ***Culex* viromes contain temporal and ecological correlates.**

240 A complex life cycle exists that supports both transmission and distribution of JEV and  
241 other agricultural, zoonotic, and arboviral factors (**Figure 3A**). Our data indicate that viruses  
242 have preferential species tropism (**Figure 2A, 3B**). By projecting the viromes of both *Cx.*  
243 *bitaeniorhynchus* and *Cx. tritaeniorhynchus* pools into Euclidian space (t-SNE), samples  
244 distinctively grouped by species (**Figure 3B**). JEV was detected in *Cx. bitaeniorhynchus* pools  
245 exclusively, which was surprising as previous studies have reported *Cx. tritaeniorhynchus* as the  
246 primary vector of JEV (42). We uncovered seasonal vector-specific prevalence and correlates by  
247 binning mosquitoes by collection date and viruses by host tropism. When binned by collection  
248 weeks (3-week sliding window), maximum infection rates of the 20 most prevalent viruses were  
249 significantly higher and putative plant pathogens peaked temporally in a species-specific manner  
250 (**Table 1**). In *Cx. tritaeniorhynchus* pools, eight (8/8) putative plant virus prevalence peaked  
251 between late June to mid-July and dropped off by the end of July with small rebounds in  
252 September and October (**Sup. Figure 1**). In *Cx. bitaeniorhynchus* pools, three (3/3) putative plant  
253 viruses peaked in August, with two (2/3) rebounding again in September corresponding to the  
254 detection of JEV GV. In contrast, non-plant viruses showed no temporal trends, suggesting that  
255 the prevalence of plant viruses may be more dependent on specific ecological cues, e.g., sap and  
256 nectar feeding and seasonal emergence of plant species.

### 257 **Ecological and vector determinants of JEV emergence and transmission.**

258           With the implication of ecological and vector impacts to the distribution of viruses in  
259 mosquito populations, we sought to determine if JEV detection was observed in a wider range of  
260 mosquito species and if that tracked with seasonal correlates. To determine if JEV could be more  
261 widely detected in mosquito species across multiple years, we performed a retrospective analysis  
262 using NGS data for mosquitoes collected between 2012-2018 to search for additional JEV  
263 sequences and determine which species were positive for JEV (**Figure 3C**). Two additional pools  
264 were positive for JEV, one each in *Cx. orientalis* and *Cx. pipiens* (**Figure 3C**). No JEV sequences  
265 were identified in *Cx. tritaeniorhynchus*. Intriguingly, all four pools (including the two positive  
266 pools of *Cx. bitaeniorhynchus*) that were positive for JEV were collected in August and  
267 September, regardless of the year that they were collected (**Figure 3C**).

268           We further explored the relationship between mosquito vectors, weather, agricultural and  
269 zoonotic events that may correlate with both JEV incidents in mosquitoes and humans (**Figures**  
270 **3C-3F**). Mosquito collections peaked with a similar timeframe as to when JEV was detected in  
271 human populations. *Culex bitaeniorhynchus* mosquito populations peaked at 45 specimens/trap-  
272 night during the collection week, beginning the second week of August. *Culex. tritaeniorhynchus*  
273 populations peaked at 401 specimens/trap-night two weeks later, starting the fourth week of  
274 August (**Figure 3C**). Analysis of data previously reported by Bae et al. (42), who examined the  
275 temporal relationship between the peak of *Cx. tritaeniorhynchus* detection in the ROK and  
276 reported cases of human JEV, demonstrated a temporal relationship where human JEV infections  
277 peak four weeks after peak JEV detection in mosquitoes (**Figure 3D**). The peak collection period  
278 of mosquitoes in this study corroborated our own findings. The peak numbers of mosquitoes  
279 collected occurred between mid-July and mid-September, with the predominant species captured

280 being *Cx. tritaeniorhynchus* (**Figure 3C**). Since the peak in mosquitoes collected occurring  
281 consistently during the same period annually, we examined historical precipitation and  
282 temperature data in this region during this same period, as both are key factors in larval habitat  
283 and growth and in adult mosquito population abundance. Both precipitation and temperatures  
284 reached annual peaks between July and August (**Figure 3E**), just preceding the peak numbers of  
285 mosquitoes collected in the region. Moreover, mosquito emergence overlapped with the start of  
286 the Fall migration of wading birds, which are known to be common reservoirs of JEV (**Figure**  
287 **3F**). Human activity also increases the time of year in areas where standing water occurs, e.g.,  
288 rice paddies and during rice harvesting (<http://www.fao.org/gIEWS>), which increases the potential  
289 for exposure to mosquitoes and subsequent vectored pathogens, e.g., JEV (42). In addition,  
290 migratory and domestic waterfowl also have increased exposure to mosquitoes, due to their  
291 presence in the rice fields at the same time that JEV mosquito vectors are at their peak (**Figure**  
292 **3F**). These findings suggest that despite *Cx. tritaeniorhynchus* being reported as the primary  
293 vector of JEV in many parts of Southeast Asia, other *Culex* species are likely competent vectors  
294 of JEV, adding concern that JEV can be vectored outside of ranges specific to *Cx.*  
295 *tritaeniorhynchus* when reservoir hosts are present. These data demonstrate that a combination of  
296 human and ecological factors increases the potential risks of JEV transmission between August  
297 and October, increasing the risk of human infections as well as transmission and dispersion of the  
298 virus through reservoirs in domestic and migratory wading birds.

### 299 **JEV genotype shift in ROK.**

300 Early reports have indicated a recent shift in the predominant circulating JEV genotype in  
301 the ROK (**Figure 4A**) (5, 6, 21). Initially, the endemic JEV genotype identified in the ROK was

302 Genotype III (GIII) until ~1990 when it shifted to Genotype I (GI) and then most recently to  
303 Genotype V (GV), which was first identified in 2010. Prior to our study, only four full JEV GV  
304 genomes were available in GenBank for sequence comparison, collected in 1952 (two nearly  
305 identical sequences reported), 2009, and 2015 (**Figure 4B**) (23, 25, 43). We utilized targeted  
306 sequencing of our JEV positive pools to assemble three full JEV genomes and we confirmed that  
307 they belonged to GV using full CDS phylogenomics (**Figure 4C**). Although all GV sequences  
308 fell neatly in the same clade, contemporary sequences have diverged significantly since 1952.  
309 The minimum intraclade similarity for all available GV full CDS sequences was 90.3%, with the  
310 two most distant sequences being the 2009 Chinese strain and the 1952 Malaysian strain  
311 (HM596272). In contrast, the minimum intraclade similarities for GI-GIV full CDS sequences  
312 are 94.5%, 95.8%, 94.2%, and 95.3%, respectfully, showing greater distance in the GV clade.  
313 Excluding the 1952 GV sequences, the minimum intraclade identity increased to 97.4%. Next,  
314 we attempted to leverage the greater availability of GV E gene sequences to determine the drivers  
315 of JEV GV emergence in the ROK (**Figure 4D**). Only negative selection was observed ( $p \leq 0.05$ )  
316 using both one and two population methods, thus speaking to other drivers of GV emergence  
317 beyond E gene selection pressure. We observed diversity among the JEV GV E gene sequences  
318 found in the ROK in recent years. For example, two JEV GV strains, which were collected on the  
319 same day, in the same vector species, and at the same collection site, were more distantly related  
320 than sequences from previous years and sources (**Figure 4D**).

### 321 **Dissimilarity of JEV GV and GIII derived vaccine strain SA14-14-2.**

322 The current JEV vaccine strain, SA14-14-2, is based on GIII, raising concerns that the  
323 emerging GV may have reduced efficacy due to dissimilarity in key regions of the genome

324 **(Figure 5A)**. The average pairwise nt similarities of contemporary circulating GI-GV strains to  
325 SA14-14-2 are 88.5, 89.0, 99.2, 84.2, and 78.7 percent, respectively. Sliding window nt similarity  
326 analysis **(Figure 5A)** shows a significant drop of similarity between GV and SA14-14-2 in the  
327 envelope (E), non-structural (NS) 2a, and NS4b genes. In particular, the E gene that resides on  
328 the exposed virion surface is essential for viral entry and contains neutralizing epitopes (44-49).  
329 Among JEV GV strains circulating in the ROK, there were observed peaks of increased entropy,  
330 suggesting areas of decreased conservation in context to the E gene domains and important  
331 immunity motifs **(Figure 5B)**.

332 We observed areas of increased amino acid (aa) divergence between SA14-14-2 and GV  
333 throughout the E protein, most notably a peak directly downstream of the fusion loop, a structure  
334 necessary for cell entry **(Figure 5C)**. Several other areas of GV and SA14-14-2 aa divergence  
335 span known neutralizing, dissimilarity unique to GV. Leveraging the consensus E gene aa  
336 sequences of all genotypes, seven GV residues with BLOSUM90 similarity scores less than -1  
337 were identified compared to 2, 2, 2, and 3 for GI through GIV ( $\leq -1$  represents a significant aa  
338 substitution). GV and GIV had two aa residue changes (Q52E and I125T) at known neutralizing  
339 residues compared to 1 (F107L) present in all genotypes (excluding attenuation sites (50))  
340 **(Figure 6A)**. Moreover, by mapping GV and SA-14-2 E protein differences onto the E protein  
341 3D structure, we found a grouping of low similarity aa unique to GV on the exposed D2 domain  
342 surface and exposed D3 lateral region **(Figure 6B)**. These high-impact residues were in a tight  
343 cluster with a handful of lesser-impact differences on the exposed D2 region, and these sites are  
344 in close proximity to neutralizing epitopes. Collectively, sequence-based analysis indicates a



345 potential for decreased efficacy of the vaccine strain SA14-14-2 against the emerging JEV GV  
346 strain.

## 347 **DISCUSSION**

348 Mosquito surveillance conducted in 2016 and 2018 at Camp Humphreys, near Seoul,  
349 ROK, revealed circulation of JEV GV in *Cx. bitaeniorhynchus*, *Cx. orientalis*, and *Cx. pipiens*  
350 mosquitoes that are less commonly associated as JEV vectors. The region in and around Seoul  
351 has been highlighted in previous studies as a region of key interest in the spread of infectious  
352 diseases including JEV, due to the ecological intersect between humans, vectors, reservoirs (e.g.,  
353 large wading migratory birds) and amplifying hosts (e.g., pigs) (42, 51). Use of metagenomics  
354 allowed for an unbiased approach to examine vectored viruses circulating in the ROK that are of  
355 human, vector, and agricultural relevance that would have otherwise gone undetected.  
356 Metagenomic analysis revealed temporal patterns of JEV emergence in the ROK, corresponding  
357 to agricultural and ecological shifts in vector and reservoir habitats. Further characterization of  
358 the JEV strains isolated revealed that the genotype detected was GV, both in 2016 and 2018. This  
359 is of critical importance, as previous reports have demonstrated that the currently approved  
360 vaccine may have limited efficacy against JEV GV (22). This study provides support for  
361 concerns regarding a probable shift in the predominant JEV genotype circulating in Southeast  
362 Asia toward a genotype for which the vaccine may provide less protection due to inherent  
363 sequence differences. Moreover, it highlights the significance of performing routine  
364 metagenomics-based analysis based on vector surveillance to detect circulating viruses of global  
365 health importance.

366 Analysis of the vector-specific viromes revealed temporal and seasonal associations of  
367 interest. Distinct temporal prevalence was observed in plant pathogens that were not found in  
368 other non-plant-associated viruses. Plant feeding patterns and the behavior of mosquitoes, in  
369 combination with flora seasonality, may bring them into proximity with competent migratory  
370 bird reservoir hosts or other vertebrate hosts, thus increasing the potential transmission of viruses  
371 from vector to reservoir as well as typically dead-end hosts (e.g., humans). Moreover, while there  
372 is a well-defined role of arthropods in transmitting pathogens of global health relevance, the  
373 burden of mosquitoes on agriculture is not a topic well explored despite the abundance of  
374 unclassified sequences related to plant viruses identified in mosquitoes in recent years. These  
375 plant virus observations in mosquito endemic areas provide data to fill knowledge gaps in virus  
376 identification, function, and evolution, and expand our understanding of these health-relevant  
377 viromes.

378 Metagenomic analysis revealed distinct differences in the viromes represented by *Cx.*  
379 *tritaeniorhynchus* and *Cx. bitaeniorhynchus* mosquito pools. Significant co-prevalence of viral  
380 sequences was observed in mosquito pools, suggesting that virome composition may contain  
381 predictive correlates for health-relevant viruses such as JEV. The distinct temporal and ecological  
382 patterns observed in the viruses identified may allow for developing a computational machine  
383 learning model to facilitate transmission and disease risk prediction. Models can be refined from  
384 continual data input from routine surveillance. This would be of critical epidemiological  
385 relevance and provide insights on how to predict and combat future outbreaks of arthropod-  
386 vectored viruses.

387           The high infection rate of the viruses reported here and elsewhere (3, 52, 53) lends  
388 importance to their role as models for virus ecology, virus-virus interactions in co-infected  
389 hosts/vectors, and virus evolution. In addition to predictive correlates, the highly abundant nature  
390 of viral genetic material found in the mosquito pools has implications on virus evolution due to  
391 the increased propensity for genetic exchange, especially among like species. Recombination  
392 requires coinfection and is common between invertebrate viruses (54). This creates the potential  
393 for recombination events within vectors and may contribute increased emerging pathogens  
394 worldwide. The correlations between observed sequences hint at viruses and virus families more  
395 likely to cause coinfection and possible recombination. From a public health viewpoint, vector-  
396 mediated recombination of viruses is of great concern (55). The wide diversity and novelty of  
397 viruses discovered by these studies help to fill knowledge gaps in virus evolution and spread. Our  
398 observations suggest that important insights would otherwise be missed with more targeted  
399 sequencing methodologies. Moreover, these studies are more in line with the One Health  
400 approach, emphasizing the importance of multifaceted ecological consideration for the control of  
401 zoonotic disease (<https://www.who.int/news-room/q-a-detail/one-health>).

402           Previous studies have implicated the co-location of reservoir species including migratory  
403 birds with the emergence of JEV (8, 56). Notably, the autumn migratory season occurs during the  
404 same period when there are peak mosquito populations and is followed by human JEV cases (51,  
405 57). The west coast of ROK near Seoul has long been identified as a key byway and nesting area  
406 for spring and fall migratory routes along the East Asian–Australasian Flyway (EAAF)  
407 (<https://www.eaaflyway.net/>) (58). It is estimated that only ~10% of birds are native to the ROK,  
408 while the remaining species are migratory birds, either spending summers (spring migrants such

409 as Chinese egrets) or winters (such as the Baikal Teal) in the ROK  
410 (<https://www.birdingkorea.com/>, <http://www.birdskoreablog.org/?p=18224>) (51). These temporal  
411 relations reveal a critical time to survey mosquito populations for circulating viruses of human  
412 relevance and highlight the potential risk for the spread of JEV from the ROK along migratory  
413 routes in the EAAF (51, 59). Our data suggest that JEV and vector emergence overlap with bird  
414 migration, which may increase the risk of JEV spread through migratory routes. Our data, along  
415 with others (24), also suggest that other *Culex* species are competent JEV GV vectors and add  
416 concerns for the transmission of JEV GV outside of ranges specific to *Cx. tritaeniorhynchus*.  
417 With the recent shift to GV (42), this poses a significant public health concern due to possible  
418 reduced efficacy of current JEV vaccines (22).

419 Examination of JEV publications demonstrated a potential shift in the dominant genotype in  
420 ROK to GV (22, 42). Existing JEV vaccines have an unverified level of protection to GV since  
421 published reports raise serious concerns of reduced vaccine efficacy. However, this concern is  
422 speculative due to a paucity of contemporary GV isolates and the lack of extensive in-vivo data  
423 (22). GV is the most distantly related genotype to the GIII derived vaccine strain and is shown to  
424 be more divergent than GI, GII, and GIV. Our analysis showed significant differences in the E,  
425 NS2a, and NS4b regions of GV compared to the SA14-14-2 vaccine. The E gene, in particular, is  
426 important for cell entry and antibody neutralization. Our data showed that GV has significant aa  
427 residue differences from SA14-14-2 at important exposed regions of the E gene. These data hint  
428 at possible mechanisms of reduced efficacy, but further in vitro study is required to confirm these  
429 observations.

430 This study revealed the diverse virome associated with *Culex* mosquitoes and identified  
431 ecological correlates to JEV. The JEV GV genomes we have identified and sequenced in this  
432 study and those in previous studies show significant sequence divergence from that of the current  
433 vaccine, reiterating concerns of vaccine efficacy and a shift of the predominant JEV genotype in  
434 the ROK. These results demonstrate the essential role of unbiased sequence-based analysis of  
435 arboviral vectors in global surveillance programs to characterize and detect emerging and re-  
436 emerging pathogens, as well as those of ecological and environmental significance.

#### 437 **Data availability**

438 Next-generation sequencing raw read data has been deposited under NCBI BioProject ID  
439 [PRJNA688920](#). Assembled viral genome sequences were deposited under NCBI GenBank  
440 accession numbers MT568527 - MT568542.

#### 441 **Funding:**

442 Funding was provided by the Armed Forces Health Surveillance Division, Global Emerging  
443 Infections Surveillance (GEIS) Section, ProMIS ID P0039\_18\_ME.

444

445 **Acknowledgments:** We thank Mr. James S. Hilaire, Ms. Nicole R. Nicholas, Mr. Tuan K.  
446 Nguyen and Ms. April N. Griggs for their assistance in project management, sample tracking,  
447 storage and retrieval. We thank Ms. Tessa Nixon and Ms. Elaina Justiniano for their assistance in  
448 data quality control.

449 **Conflicts of Interest:** The authors declare no conflict of interest.

450 **Disclaimer:** Material has been reviewed by the authors' respective institutions. There is no  
451 objection to its presentation and/or publication.

452 The views expressed in this article are those of the authors and do not necessarily reflect the  
453 official policy or position of the Department of the Army, Department of Defense, or the U.S.  
454 Government. Authors, as employees of the U.S. Government (KMW, HCK, RGJ, TAK, JH),  
455 conducted the work as part of their official duties. Title 17 U.S.C. §105 provides that ‘Copyright  
456 protection under this title is not available for any work of the United States Government.’ Title  
457 17 U.S.C. §101 defines a U.S. Government work is a work prepared by an employee of the U.S.  
458 Government as part of the person’s official duties.

459

460

461 **Figure legends**

462 **Fig 1**

463 **Metagenomics sequence data of the 2018 Camp Humphreys mosquitoes.** (A) Map of the  
464 ROK showing the 2018 Camp Humphreys (star), in addition to other MEDDAC-Korea collection  
465 sites (blue dots). Estimated population densities are shown by the shade of orange from dark  
466 (high population) to light (low population). (B) Distribution of reads per sample. (C) *De novo*  
467 assembled contig length distribution (D) Reads per sample by superkingdom. (E) Total reads by  
468 superkingdom. (F) Plot of total reads by known or putative viral classifications separated by  
469 mosquito species. Classifications are ordered from left to right by total number of reads. Known  
470 classification tropism (vertebrate, mosquito, plant) is shown by the top cartoons but may not  
471 accurately represent many of the highly novel sequences found.

472

473 **Fig 2**

474 **Clustering and relative abundance of viruses found in the mosquito pools.** (A) Binary  
475 clustermap showing the relatedness of unique viruses found in more than 2 pools simultaneously  
476 with the relatedness of individual pools with more than 1 identified virus sequence. Virus  
477 sequence correlation is depicted by horizontal clustering and the top dendrogram and is color  
478 coded (see key) by known or putative classification. Vertical clustering and left dendrogram  
479 represents the relatedness of mosquito pools and is color coded by mosquito species. Numbers  
480 correspond to rank in Table 1. (B) Relative abundance of viruses by mosquito species in the pool  
481 as extracted from the clustermap and color-coded according to the key.

482

483 **Fig 3**

484 **Ecological and temporal factors of JEV in ROK. (A)** *Culex* mosquitoes vector viruses across  
485 kingdoms and phylum and play an important role in the maintenance of JEV in addition to plant,  
486 arboviral, and vertebrate viruses. **(B)** tSNE plot of the sequenced mosquito pools as determined  
487 by virome composition. The two pools positive for JEV are indicated by the dashed red circles.  
488 **(C)** Plot of the total number of individuals from the indicated mosquito species collected at Camp  
489 Humphreys in 2018. Vertical dashed lines represent the collection periods and the colored dashed  
490 plot lines are the logarithmic representation of the same data. Arrows color coded by species,  
491 represent the weeks JEV GV was found. \* indicates that JEV was found in that species in 2016 in  
492 Seoul. **(D)** Heatmap of weeks with human JEV cases and *Cx. tritaeniorhynchus* observed from  
493 2011-2016 with white being no observations and the darkest shade of orange representing  
494 observations all 6 years. **(E)** Average weather in Seoul, ROK as reported by NOAA with the  
495 solid line representing temperature highs, dashed line representing temperature lows, and the blue  
496 bars representing monthly average precipitation. **(F)** Temporal representation of fowl and the rice  
497 growing/harvesting season in the ROK (<https://www.birdingkorea.com/>,  
498 <http://www.birdskoreablog.org/?p=18224>, <http://www.fao.org/giews>) (58). From top to bottom  
499 the bars represent: typical bird season in ROK, *Anas Formosa*, Chinese egrets, and the rice  
500 growing/harvesting season. Fowl behavior is indicated by white for wintering, light green for  
501 arrival of migratory birds, brown for nesting, grey for normal activities, and orange for migratory  
502 departure. Dashed lines represent when migratory birds are absent in the ROK. The rice season is  
503 coded left to right by planting, growing, and harvesting, respectively.

504

505



506 **Fig 4**

507 **JEV genotype shift in ROK.** (A) Distribution of JEV genotypes observed in ROK with each  
508 square representing a year with an observation. (B) Number of full genomes available on  
509 genbank by JEV genotype. (C) GTR-I-G constructed tree of all available JEV full genomes  
510 rooted with an Usutu virus genome. The yellow star represents the clade where the ROK  
511 genomes assembled in this study fall and the green star represents the clade containing SA14-14-  
512 2 live attenuated JEV vaccine. (D) GTR-I-G phylogeny of all available GV E gene nt sequences  
513 rooted to a GIII outgroup. Stars denote the sequences found in this study. Bootstrap values are  
514 shown.

515

516 **Fig 5**

517 **Dissimilarity of JEV GV and GIII derived vaccine strain SA14-14-2.** (A) Sliding window  
518 chart of nucleotide similarity between the natural-occurring JEV genomes collected in or after  
519 2010 (except for GIV which only pre-2010 genomes were available) with SA14-14-2 as baseline.  
520 The average identity of each genotype is shown by the dashed lines. The sliding window was 500  
521 nt and the step was 50 nt as shown to scale by the horizontal black bars. The JEV protein layout  
522 is shown below. (B) Shannon entropy of the 18 contemporary E gene nucleotide sequences. The  
523 entropy was averaged by codon. The line chart is color coded by domain. The fusion loop and  
524 neutralizing epitopes are shown by the violet and green colors respectively. (C) Change in  
525 BLOSUM90 aa similarity scores between the E gene consensus aa sequences of each genotype  
526 against SA14-14-2 of natural-occurring genomes collected in or after 2010 (except for GIV). The  
527 SA14-14-2 E gene tertiary structure domains depicted by the bottom bar and colored by red, DI;  
528 yellow, DII; violet, fusion loop; blue, DIII; green, stem; and light-blue, transmembrane region.

529 Vertical black bars represent the position of neutralizing epitopes identified on SA14-14-2. The  
530 horizontal black bars represent the window size of 10 and step size of 2 to scale.

531

### 532 **Fig 6**

533 **Regions of significant aa divergence in the GV E gene.** (A) Amino acid alignment of the E  
534 gene genotype consensus sequences compared to SA14-14-2. The SA14-14-2 E gene tertiary  
535 structure domains depicted by the bottom bar and colored by red, DI; yellow, DII; blue, DIII;  
536 green, stem; and light-blue, transmembrane region. The fusion loop is highlighted by the violet  
537 box and neutralizing epitopes are highlighted by lime-green. All amino acids with BLOSUM90  
538 scores less than -1 relative to the SA14-14-2 strain are shown highlighted in yellow. \* indicates  
539 sites of SA14-14-2 attenuation identified by Gromowski et al. (50) (B) 3D model of GV changes  
540 mapped onto the crystal structure of SA14-14-2 (3p54). All changes are represented by dark grey  
541 and unique differences to GV with BLOSUM90 scores of less than -1 are highlighted by yellow.  
542 The top exposed surface of the protein is faced towards the reader.

### 543 **Supplemental Fig 1**

544 **Temporal dynamics of plant viruses in mosquitoes.** (A) Timeseries of the most highly  
545 prevalent *Cx. tritaeniorhynchus* plant viruses (all sobemo-like). Weeks correspond to ISO week  
546 dates (27 = late June/early July). (B) Timeseries of the most highly prevalent *Cx.*  
547 *bitaeniorhynchus* plant viruses

548

549

## 550 References

- 551 1. Gould E, Pettersson J, Higgs S, Charrel R, de Lamballerie X. 2017. Emerging arboviruses: why  
552 today? *One Health* 4:1-13.
- 553 2. Jones KE, Patel NG, Levy MA, Storeygard A, Balk D, Gittleman JL, Daszak P. 2008. Global trends in  
554 emerging infectious diseases. *Nature* 451:990-3.
- 555 3. Sanborn MA, Klein TA, Kim HC, Fung CK, Figueroa KL, Yang Y, Asafo-Adjei EA, Jarman RG, Hang J.  
556 2019. Metagenomic Analysis Reveals Three Novel and Prevalent Mosquito Viruses from a Single  
557 Pool of *Aedes vexans nipponii* Collected in the Republic of Korea. *Viruses* 11.
- 558 4. Faizah AN, Kobayashi D, Isawa H, Amoa-Bosompem M, Murota K, Higa Y, Futami K, Shimada S,  
559 Kim KS, Itokawa K, Watanabe M, Tsuda Y, Minakawa N, Miura K, Hirayama K, Sawabe K. 2020.  
560 Deciphering the Virome of *Culex vishnui* Subgroup Mosquitoes, the Major Vectors of Japanese  
561 Encephalitis, in Japan. *Viruses* 12.
- 562 5. Kim HC, Klein TA, Takhampunya R, Evans BP, Mingmongkolchai S, Kengluetcha A, Grieco J,  
563 Masuoka P, Kim MS, Chong ST, Lee JK, Lee WJ. 2011. Japanese encephalitis virus in culicine  
564 mosquitoes (Diptera: Culicidae) collected at Daeseongdong, a village in the demilitarized zone of  
565 the Republic of Korea. *J Med Entomol* 48:1250-6.
- 566 6. Kim HC, Takhampunya R, Tippayachai B, Chong ST, Park JY, Kim MS, Seo HJ, Yeh JY, Lee WJ, Lee  
567 DK, Klein TA. 2015. Japanese encephalitis virus in culicine mosquitoes (Diptera: culicidae) of the  
568 republic of Korea, 2008-2010. *Mil Med* 180:158-67.
- 569 7. Oliveira ARS, Cohnstaedt LW, Strathe E, Etcheverry L, McVey DS, Piaggio J, Cernicchiaro N. 2018.  
570 Meta-Analyses of Japanese Encephalitis Virus Infection, Dissemination, and Transmission Rates  
571 in Vectors. *Am J Trop Med Hyg* 98:883-890.
- 572 8. Oliveira ARS, Cohnstaedt LW, Strathe E, Hernandez LE, McVey DS, Piaggio J, Cernicchiaro N.  
573 2017. Meta-analyses of the proportion of Japanese encephalitis virus infection in vectors and  
574 vertebrate hosts. *Parasit Vectors* 10:418.
- 575 9. Takhampunya R, Kim HC, Tippayachai B, Kengluetcha A, Klein TA, Lee WJ, Grieco J, Evans BP.  
576 2011. Emergence of Japanese encephalitis virus genotype V in the Republic of Korea. *Virology*  
577 8:449.
- 578 10. Solomon T, Dung NM, Kneen R, Gainsborough M, Vaughn DW, Khanh VT. 2000. Japanese  
579 encephalitis. *J Neurol Neurosurg Psychiatry* 68:405-15.
- 580 11. Erlanger TE, Weiss S, Keiser J, Utzinger J, Wiedenmayer K. 2009. Past, present, and future of  
581 Japanese encephalitis. *Emerg Infect Dis* 15:1-7.
- 582 12. Oliveira ARS, Cohnstaedt LW, Noronha LE, Mitzel D, McVey DS, Cernicchiaro N. 2020.  
583 Perspectives regarding the risk of introduction of the Japanese encephalitis virus (JEV) in the  
584 United States. *Front Vet Sci* 7:48.
- 585 13. Campbell GL, Hills SL, Fischer M, Jacobson JA, Hoke CH, Hombach JM, Marfin AA, Solomon T, Tsai  
586 TF, Tsu VD, Ginsburg AS. 2011. Estimated global incidence of Japanese encephalitis: a systematic  
587 review. *Bull World Health Organ* 89:766-74, 774A-774E.
- 588 14. Solomon T. 2006. Control of Japanese encephalitis--within our grasp? *N Engl J Med* 355:869-71.
- 589 15. Myint KS, Gibbons RV, Perng GC, Solomon T. 2007. Unravelling the neuropathogenesis of  
590 Japanese encephalitis. *Trans R Soc Trop Med Hyg* 101:955-6.
- 591 16. Ooi MH, Lewthwaite P, Lai BF, Mohan A, Clear D, Lim L, Krishnan S, Preston T, Chieng CH, Tio PH,  
592 Wong SC, Cardoso J, Solomon T. 2008. The epidemiology, clinical features, and long-term

- 593 prognosis of Japanese encephalitis in central Sarawak, Malaysia, 1997-2005. Clin Infect Dis  
594 47:458-68.
- 595 17. Solomon T, Dung NM, Kneen R, Thao le TT, Gainsborough M, Nisalak A, Day NP, Kirkham FJ,  
596 Vaughn DW, Smith S, White NJ. 2002. Seizures and raised intracranial pressure in Vietnamese  
597 patients with Japanese encephalitis. Brain 125:1084-93.
- 598 18. Solomon T, Vaughn DW. 2002. Pathogenesis and clinical features of Japanese encephalitis and  
599 West Nile virus infections. Curr Top Microbiol Immunol 267:171-94.
- 600 19. Turtle L, Easton A, Defres S, Ellul M, Bovill B, Hoyle J, Jung A, Lewthwaite P, Solomon T. 2019.  
601 'More than devastating'-patient experiences and neurological sequelae of Japanese encephalitis  
602 section sign. J Travel Med 26.
- 603 20. Weaver SC, Barrett AD. 2004. Transmission cycles, host range, evolution and emergence of  
604 arboviral disease. Nat Rev Microbiol 2:789-801.
- 605 21. Seo HJ, Kim HC, Klein TA, Ramey AM, Lee JH, Kyung SG, Park JY, Cho YS, Cho IS, Yeh JY. 2013.  
606 Molecular detection and genotyping of Japanese encephalitis virus in mosquitoes during a 2010  
607 outbreak in the Republic of Korea. PLoS One 8:e55165.
- 608 22. Cao L, Fu S, Gao X, Li M, Cui S, Li X, Cao Y, Lei W, Lu Z, He Y, Wang H, Yan J, Gao GF, Liang G. 2016.  
609 Low protective efficacy of the current Japanese encephalitis vaccine against the emerging  
610 genotype 5 Japanese encephalitis virus. PLoS Negl Trop Dis 10:e0004686.
- 611 23. Li MH, Fu SH, Chen WX, Wang HY, Guo YH, Liu QY, Li YX, Luo HM, Da W, Duo Ji DZ, Ye XM, Liang  
612 GD. 2011. Genotype V Japanese encephalitis virus is emerging. PLoS Negl Trop Dis 5:e1231.
- 613 24. Kim H, Cha GW, Jeong YE, Lee WG, Chang KS, Roh JY, Yang SC, Park MY, Park C, Shin EH. 2015.  
614 Detection of Japanese encephalitis virus genotype V in *Culex orientalis* and *Culex pipiens*  
615 (Diptera: Culicidae) in Korea. PLoS One 10:e0116547.
- 616 25. Woo JH, Jeong YE, Jo JE, Shim SM, Ryou J, Kim KC, Lee WJ, Lee JY. 2020. Genetic characterization  
617 of Japanese encephalitis virus Genotype 5 isolated from patient, South Korea, 2015. Emerg Infect  
618 Dis 26:1002-1006.
- 619 26. Tanaka K, Mizusawa K, Saugstad ES. 1979. A revision of the adult and larval mosquitoes of Japan  
620 (including the Ryukyu Archipelago and the Ogasawara Islands) and Korea (Diptera: Culicidae).  
621 ARMY MEDICAL LAB PACIFIC APO SAN FRANCISCO 96343,
- 622 27. Hang J, Forshey BM, Kochel TJ, Li T, Solorzano VF, Halsey ES, Kuschner RA. 2012. Random  
623 amplification and pyrosequencing for identification of novel viral genome sequences. J Biomol  
624 Tech 23:4-10.
- 625 28. Kilianski A, Carcel P, Yao S, Roth P, Schulte J, Donarum GB, Fochler ET, Hill JM, Liem AT, Wiley  
626 MR, Ladner JT, Pfeffer BP, Elliot O, Petrosov A, Jima DD, Vallard TG, Melendrez MC, Skowronski  
627 E, Quan PL, Lipkin WI, Gibbons HS, Hirschberg DL, Palacios GF, Rosenzweig CN. 2015.  
628 Pathosphere.org: pathogen detection and characterization through a web-based, open source  
629 informatics platform. BMC Bioinformatics 16:416.
- 630 29. Martin M. 2011. Cutadapt removes adapter sequences from high-throughput sequencing reads.  
631 EMBnet:10-12.
- 632 30. Schmieder R, Edwards R. 2011. Quality control and preprocessing of metagenomic datasets.  
633 Bioinformatics 27:863-4.
- 634 31. Boisvert S, Raymond F, Godzaridis E, Laviolette F, Corbeil J. 2012. Ray Meta: scalable de novo  
635 metagenome assembly and profiling. Genome Biol 13:R122.
- 636 32. Huang X, Madan A. 1999. CAP3: A DNA sequence assembly program. Genome Res 9:868-77.
- 637 33. Li W, Godzik A. 2006. Cd-hit: a fast program for clustering and comparing large sets of protein or  
638 nucleotide sequences. Bioinformatics 22:1658-9.

- 639 34. Junglen S, Kopp A, Kurth A, Pauli G, Ellerbrok H, Leendertz FH. 2009. A new flavivirus and a new  
640 vector: characterization of a novel flavivirus isolated from *Uranotaenia* mosquitoes from a  
641 tropical rain forest. *J Virol* 83:4462-8.
- 642 35. Hepworth G, Biggerstaff BJ. 2017. Bias correction in estimating proportions by pooled testing. *J*  
643 *Agric Biol Environ Stat* 22:602-614.
- 644 36. Zhang BB, Christopher ;Biggerstaf, Brad f; Schaarschmidt, Frank ;Hitt, Brianna 2018. binGroup:  
645 Evaluation and experimental design for binomial group testing.
- 646 37. Kazutaka Katoh KM, Kei-ichi Kuma, Takashi Miyata. 2002. MAFFT: a novel method for rapid  
647 multiple sequence alignment based on fast Fourier transform *Nucleic Acids Research* 30:3059-  
648 3066.
- 649 38. Posada D. 2008. jModelTest: phylogenetic model averaging. *Mol Biol Evol* 25:1253-6.
- 650 39. Guindon S, Gascuel O. 2003. A simple, fast, and accurate algorithm to estimate large phylogenies  
651 by maximum likelihood. *Syst Biol* 52:696-704.
- 652 40. Kumar S, Stecher G, Li M, Knyaz C, Tamura K. 2018. MEGA X: Molecular evolutionary genetics  
653 analysis across computing platforms. *Mol Biol Evol* 35:1547-1549.
- 654 41. Pond SL, Frost SD, Muse SV. 2005. HyPhy: hypothesis testing using phylogenies. *Bioinformatics*  
655 21:676-9.
- 656 42. Bae W, Kim JH, Kim J, Lee J, Hwang ES. 2018. Changes of epidemiological characteristics of  
657 Japanese encephalitis viral infection and birds as a potential viral transmitter in Korea. *J Korean*  
658 *Med Sci* 33:e70.
- 659 43. Matsuura K, Mogi K, Sakurai M, Kawamura T, Takahara Y. 2011. Impact of preexisting cerebral  
660 ischemia detected by magnetic resonance imaging and angiography on late outcome after  
661 coronary artery bypass surgery. *Ann Thorac Surg* 91:665-70.
- 662 44. Crill WD, Chang GJ. 2004. Localization and characterization of flavivirus envelope glycoprotein  
663 cross-reactive epitopes. *J Virol* 78:13975-86.
- 664 45. Vogt MR, Moesker B, Goudsmit J, Jongeneelen M, Austin SK, Oliphant T, Nelson S, Pierson TC,  
665 Wilschut J, Throsby M, Diamond MS. 2009. Human monoclonal antibodies against West Nile  
666 virus induced by natural infection neutralize at a postattachment step. *J Virol* 83:6494-507.
- 667 46. Goncalvez AP, Chien CH, Tubthong K, Gorshkova I, Roll C, Donau O, Schuck P, Yoksan S, Wang SD,  
668 Purcell RH, Lai CJ. 2008. Humanized monoclonal antibodies derived from chimpanzee Fabs  
669 protect against Japanese encephalitis virus in vitro and in vivo. *J Virol* 82:7009-21.
- 670 47. Wu KP, Wu CW, Tsao YP, Kuo TW, Lou YC, Lin CW, Wu SC, Cheng JW. 2003. Structural basis of a  
671 flavivirus recognized by its neutralizing antibody: solution structure of the domain III of the  
672 Japanese encephalitis virus envelope protein. *J Biol Chem* 278:46007-13.
- 673 48. Morita K, Tadano M, Nakaji S, Kosai K, Mathenge EG, Pandey BD, Hasebe F, Inoue S, Igarashi A.  
674 2001. Locus of a virus neutralization epitope on the Japanese encephalitis virus envelope protein  
675 determined by use of long PCR-based region-specific random mutagenesis. *Virology* 287:417-26.
- 676 49. Kobayashi Y, Hasegawa H, Yamauchi T. 1985. Studies on the antigenic structure of Japanese  
677 encephalitis virus using monoclonal antibodies. *Microbiol Immunol* 29:1069-82.
- 678 50. Gromowski GD, Firestone CY, Whitehead SS. 2015. Genetic Determinants of Japanese  
679 encephalitis virus vaccine strain SA14-14-2 that govern attenuation of virulence in mice. *J Virol*  
680 89:6328-37.
- 681 51. van den Hurk AF, Ritchie SA, Mackenzie JS. 2009. Ecology and geographical expansion of  
682 Japanese encephalitis virus. *Annu Rev Entomol* 54:17-35.

- 683 52. Atoni E, Zhao L, Karungu S, Obanda V, Agwanda B, Xia H, Yuan Z. 2019. The discovery and global  
684 distribution of novel mosquito-associated viruses in the last decade (2007-2017). *Rev Med Virol*  
685 29:e2079.
- 686 53. Manni M, Zdobnov EM. 2020. A novel Anopheles virus in *Aedes albopictus* mosquitoes is distributed  
687 worldwide and interacts with the host RNA interference pathway. *Viruses* 12.
- 688 54. Shi M, Lin XD, Tian JH, Chen LJ, Chen X, Li CX, Qin XC, Li J, Cao JP, Eden JS, Buchmann J, Wang W,  
689 Xu J, Holmes EC, Zhang YZ. 2016. Redefining the invertebrate RNA virosphere. *Nature* 540:539-  
690 543.
- 691 55. Twiddy SS, Holmes EC. 2003. The extent of homologous recombination in members of the genus  
692 *Flavivirus*. *J Gen Virol* 84:429-440.
- 693 56. Yap G, Lim XF, Chan S, How CB, Humaidi M, Yeo G, Mailepessov D, Kong M, Lai YL, Okumura C,  
694 Ng LC. 2019. Serological evidence of continued Japanese encephalitis virus transmission in  
695 Singapore nearly three decades after end of pig farming. *Parasit Vectors* 12:244.
- 696 57. Lord JS, Gurley ES, Pulliam JR. 2015. Rethinking Japanese Encephalitis Virus Transmission: A  
697 framework for implicating host and vector species. *PLoS Negl Trop Dis* 9:e0004074.
- 698 58. Wang X, Cao L, Fox AD, Fuller R, Griffin L, Mitchell C, Zhao Y, Moon OK, Cabot D, Xu Z, Batbayar  
699 N, Kolzsch A, van der Jeugd HP, Madsen J, Chen L, Nathan R. 2019. Author Correction: Stochastic  
700 simulations reveal few green wave surfing populations among spring migrating herbivorous  
701 waterfowl. *Nat Commun* 10:3191.
- 702 59. Gao X, Liu H, Li X, Fu S, Cao L, Shao N, Zhang W, Wang Q, Lu Z, Lei W, He Y, Cao Y, Wang H, Liang  
703 G. 2019. Changing geographic distribution of Japanese encephalitis virus genotypes, 1935-2017.  
704 *Vector Borne Zoonotic Dis* 19:35-44.

705

**Table 1** Mosquito infection rates of the 20 most prevalent viruses and JEV GV

| Rank | Novel | Classification       | Accession                    | Name                                        | <i>Cx. bit.</i> |                    | <i>Cx. tri.</i> |                    | 3 week maxima      |       |
|------|-------|----------------------|------------------------------|---------------------------------------------|-----------------|--------------------|-----------------|--------------------|--------------------|-------|
|      |       |                      |                              |                                             | Positive pools  | Infection rate (%) | Positive pools  | Infection rate (%) | Infection rate (%) | Month |
| 1    |       | <i>Rhabdoviridae</i> | AB604791                     | Culex tritaeniorhynchus rhabdovirus         | 12              | 0.49               | 145             | 11.18              | > CUL*             | NA    |
| 2    |       | Sobemo-like          | KX882764, KX882765.          | Hubei mosquito virus 2                      | 7               | 0.28               | 139             | 9.17               | > CUL*             | NA    |
| 3    | x     | Virga-like           | MT568541                     | Pyeongtaek Culex virga-like virus A18.2454  | 88              | 11.18              | 23              | 0.62               | > CUL*             | Aug   |
| 4    | x     | Bunya-like           | MT568528, MT568533, MT568527 | Pyeongtaek Culex bunyavirus A18.3210        | 76              | 6.25               | 17              | 0.46               | 9.4                | July  |
| 5    |       | <i>Bunyavirales</i>  | KM817698, KM817759, KM817727 | Wuhan Mosquito Virus 2                      | 0               | 0.00               | 84              | 3.14               | 6.1                | Aug   |
| 6    | x     | Toti-like            |                              |                                             | 61              | 3.78               | 1               | 0.03               | 5.1                | July  |
| 7    |       | <i>Rhabdoviridae</i> | KU095840                     | Tongilchon virus 1                          | 60              | 3.69               | 0               | 0.00               | > CUL*             | Sep   |
| 8    |       | <i>Flaviviridae</i>  | MG719525                     | Quang Binh virus                            | 1               | 0.04               | 46              | 1.39               | 3.5                | July  |
| 9    | x     | Sobemo-like          |                              |                                             | 0               | 0.00               | 45              | 1.36               | 4.2                | July  |
| 10   | x     | Orthomyxo-like       | MT568529                     | Pyeongtaek Culex orthomyxovirus 18-0874     | 34              | 1.59               | 0               | 0.00               | > CUL*             | Oct   |
| 11   | x     | Sobemo-like          | MT568530                     | Pyeongtaek Culex sobemo-like virus 18-0862  | 0               | 0.00               | 31              | 0.88               | 4.2                | July  |
| 12   | x     | Unknown              |                              |                                             | 27              | 1.22               | 0               | 0.00               | 1.8                | Aug   |
| 13   | x     | Luteo-like           | MT568531                     | Pyeongtaek Culex luteo-like virus A18.3206  | 23              | 1.02               | 0               | 0.00               | 3.9                | Sep   |
| 14   | x     | Sobemo-like          |                              |                                             | 0               | 0.00               | 20              | 0.55               | 1.7                | July  |
| 15   |       | Sobemo-like          | KX882830                     | Wenzhou sobemo-like virus 3                 | 0               | 0.00               | 19              | 0.51               | 1.7                | July  |
| 16   | x     | Luteo-like           |                              |                                             | 18              | 0.77               | 0               | 0.00               | 3.9                | Sep   |
| 17   | x     | Sobemo-like          |                              |                                             | 0               | 0.00               | 17              | 0.46               | 2.9                | July  |
| 18   | x     | Sobemo-like          |                              |                                             | 0               | 0.00               | 16              | 0.43               | 2.5                | July  |
| 19   | x     | Sobemo-like          |                              |                                             | 0               | 0.00               | 15              | 0.40               | 1.5                | July  |
| 20   | x     | Sobemo-like          | MT568542                     | Pyeongtaek Culex sobemo-like virus A18.2268 | 0               | 0.00               | 15              | 0.40               | 3.7                | July  |
| NA   | x     | <i>Flaviviridae</i>  | MT568538, MT568539, MT568540 | Japanese encephalitis virus                 | 2               | 0.08               | 0               | 0.00               | 0.5                | NA    |

\* All pools were positive in this timeframe and therefore greater than the calculable upper limit (CUL)

**Table 2** Significantly correlated viruses in mosquito pools

| Virus 1                                    |                      | Virus 2                                     |                    | Partial Correlation |          |
|--------------------------------------------|----------------------|---------------------------------------------|--------------------|---------------------|----------|
| Name                                       | Classification       | Name                                        | Classification     | r                   | P value  |
| Unnamed                                    | Chaq-like            | Unnamed                                     | Partiti-like       | 0.85                | 2.20E-35 |
| Unnamed                                    | Sobemo-like          | Unnamed                                     | Chaq-like          | 0.80                | 3.60E-29 |
| Unnamed                                    | Luteo-like           | Pyeongtaek Culex luteo-like virus A18.3206  | Luteo-like         | 0.71                | 3.03E-20 |
| Unnamed                                    | Sobemo-like          | Pyeongtaek Culex sobemo-like virus A18.2268 | Sobemo-like        | 0.70                | 3.02E-19 |
| Wenzhou sobemo-like virus 3                | Sobemo-like          | Unnamed                                     | Sobemo-like        | 0.63                | 6.27E-15 |
| Unnamed                                    | Sobemo-like          | Unnamed                                     | Sobemo-like        | 0.56                | 1.91E-11 |
| Pyeongtaek Culex Virga-like virus A18.2454 | Virga-like           | Pyeongtaek Culex Bunyavirus A18.3210        | Bunya-like         | 0.52                | 4.65E-10 |
| Culex tritaeniorhynchus rhabdovirus        | <i>Rhabdoviridae</i> | Hubei mosquito virus 2                      | Sobemo-like        | 0.43                | 4.65E-07 |
| Unnamed                                    | Rhabdo-like          | Unnamed                                     | <i>Rhabdo-like</i> | 0.43                | 5.98E-07 |
| Tongilchon virus 1                         | <i>Rhabdoviridae</i> | Unnamed                                     | Toti-like          | 0.28                | 1.47E-03 |
| Unnamed                                    | Unknown              | Unnamed                                     | Unknown            | 0.26                | 3.43E-03 |
| Unnamed                                    | Unknown              | Unnamed                                     | Unknown            | 0.25                | 4.99E-03 |



**Supplemental Table 1** Additional virus reads in JEV GV positive pools

| Accession                    | Name                                       | Classification          | Reads    |            |
|------------------------------|--------------------------------------------|-------------------------|----------|------------|
|                              |                                            |                         | A18.3208 | A18.3210 * |
| MT568541                     | Pyeongtaek Culex Virga-like virus A18.2454 | Virga-like              | 2287     | 367080     |
| MT568528, MT568533, MT568527 | Pyeongtaek Culex Bunyavirus A18.3210       | Bunya-like              | 3853     | 95562      |
| KU095840                     | Unnamed 1                                  | <i>Rhabdoviridae</i>    | 112      | 11694      |
|                              | Unnamed 2                                  | <i>Bunyavirales</i>     | <5       | 5856       |
| MT568529                     | Pyeongtaek Culex Orthomyxovirus 18-0874    | Orthomyxo-like          | 38       | 10151      |
| MT568531                     | Pyeongtaek Culex luteo-like virus A18.3206 | Luteo-like              | 146      | 2073       |
|                              | Unnamed 3                                  | <i>Orthomyxoviridae</i> | 14       | 1502       |
|                              | Unnamed 4                                  | <i>Luteoviridae</i>     | 16       | 609        |
|                              | Unnamed 5                                  | Unknown                 | <5       | 144        |
|                              | Unnamed 6                                  | Unknown                 | <5       | 137        |
|                              | Unnamed 7                                  | <i>Totiviridae</i>      | 86       | <5         |
|                              | Unnamed 8                                  | Unknown                 | <5       | 81         |
| KX882764, KX882765           | Hubei mosquito virus 2                     | <i>Sobemoviridae</i>    | <5       | 54         |
|                              | Unnamed 9                                  | Unknown                 | <5       | 16         |
|                              | Unnamed 10                                 | <i>Rhabdoviridae</i>    | 12       | <5         |
|                              | Unnamed 11                                 | Unknown                 | <5       | 10         |

\*A18.3210 was sequenced at much higher depth

A

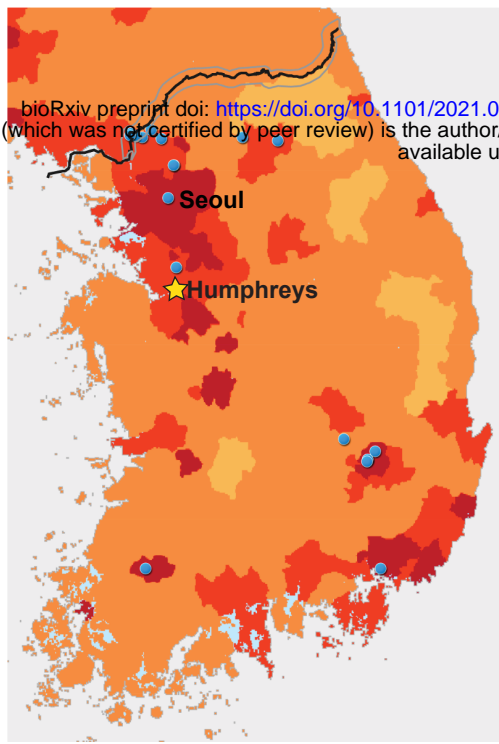

B

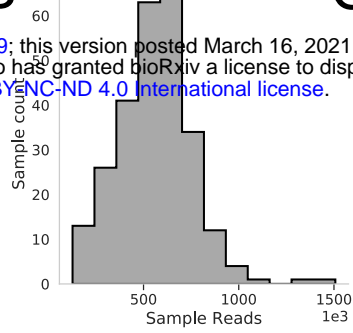

C

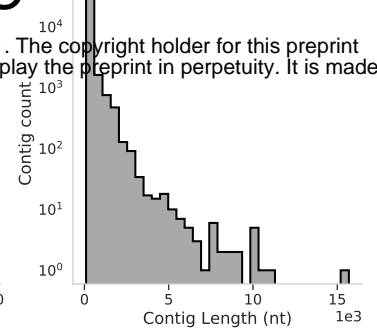

D

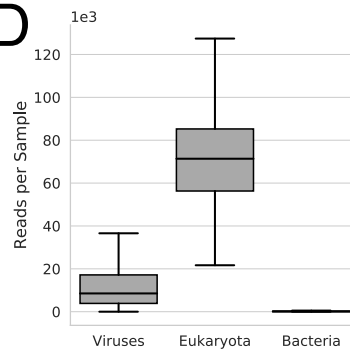

E

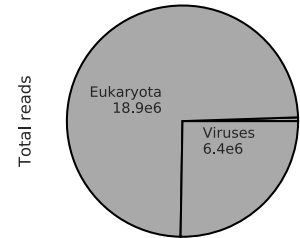

F

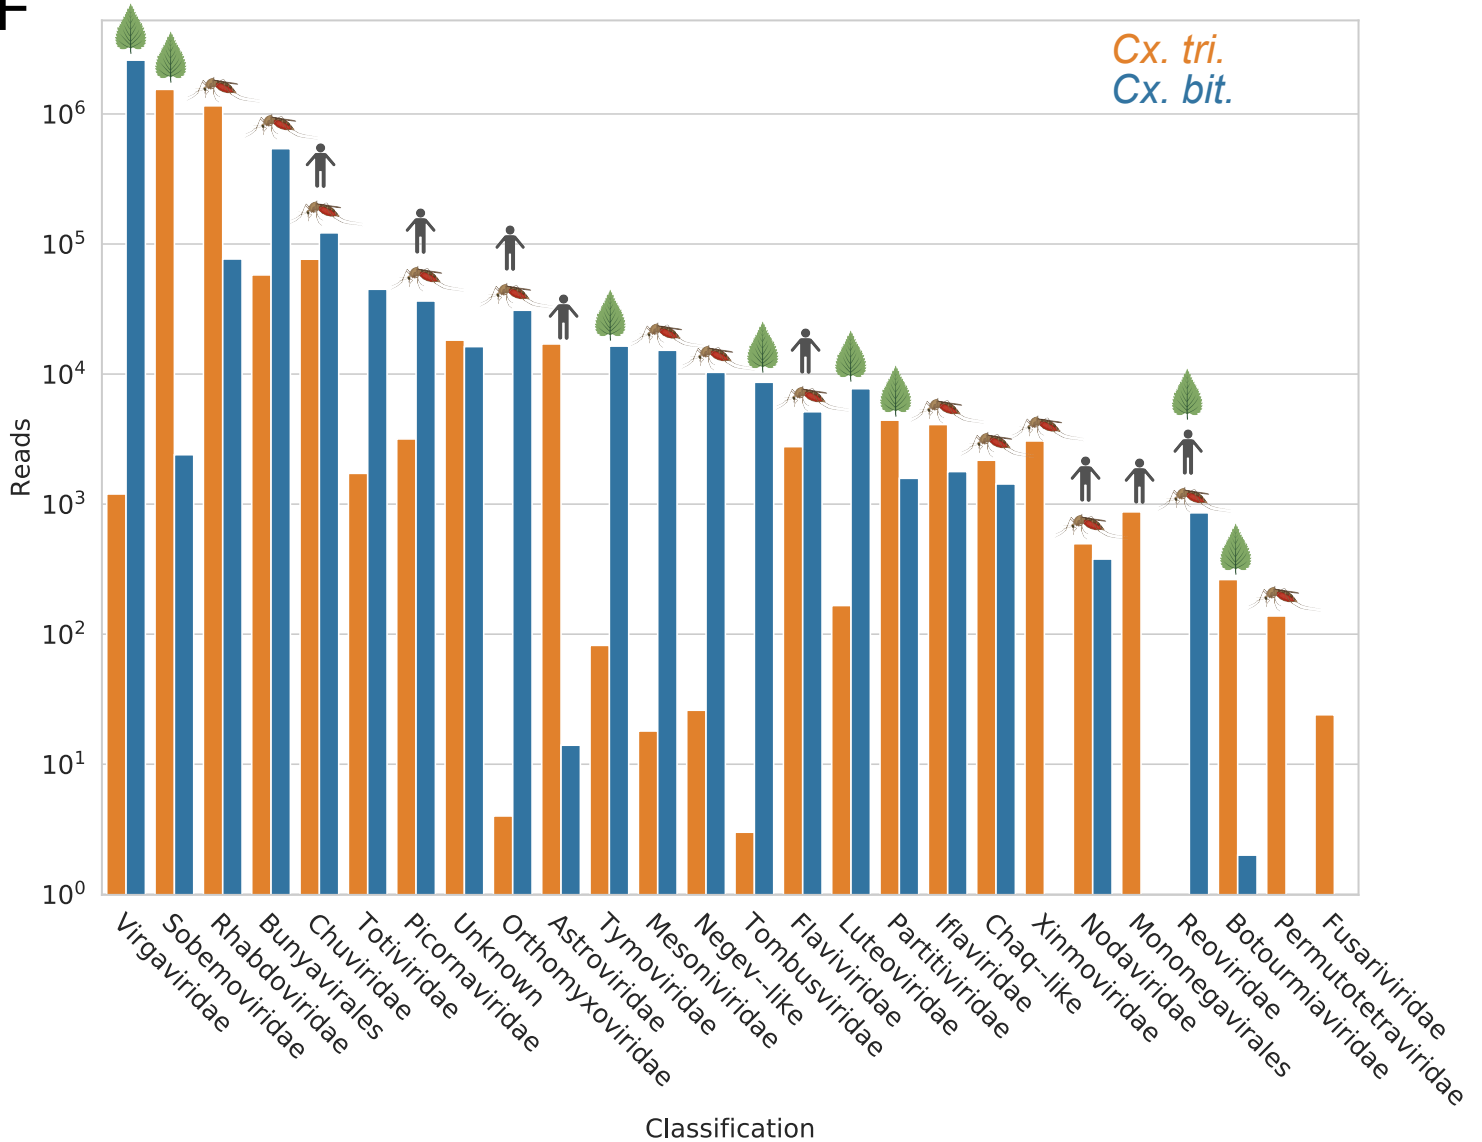

**Figure 1** Metagenomics sequence data of the 2018 Camp Humphreys mosquitoes

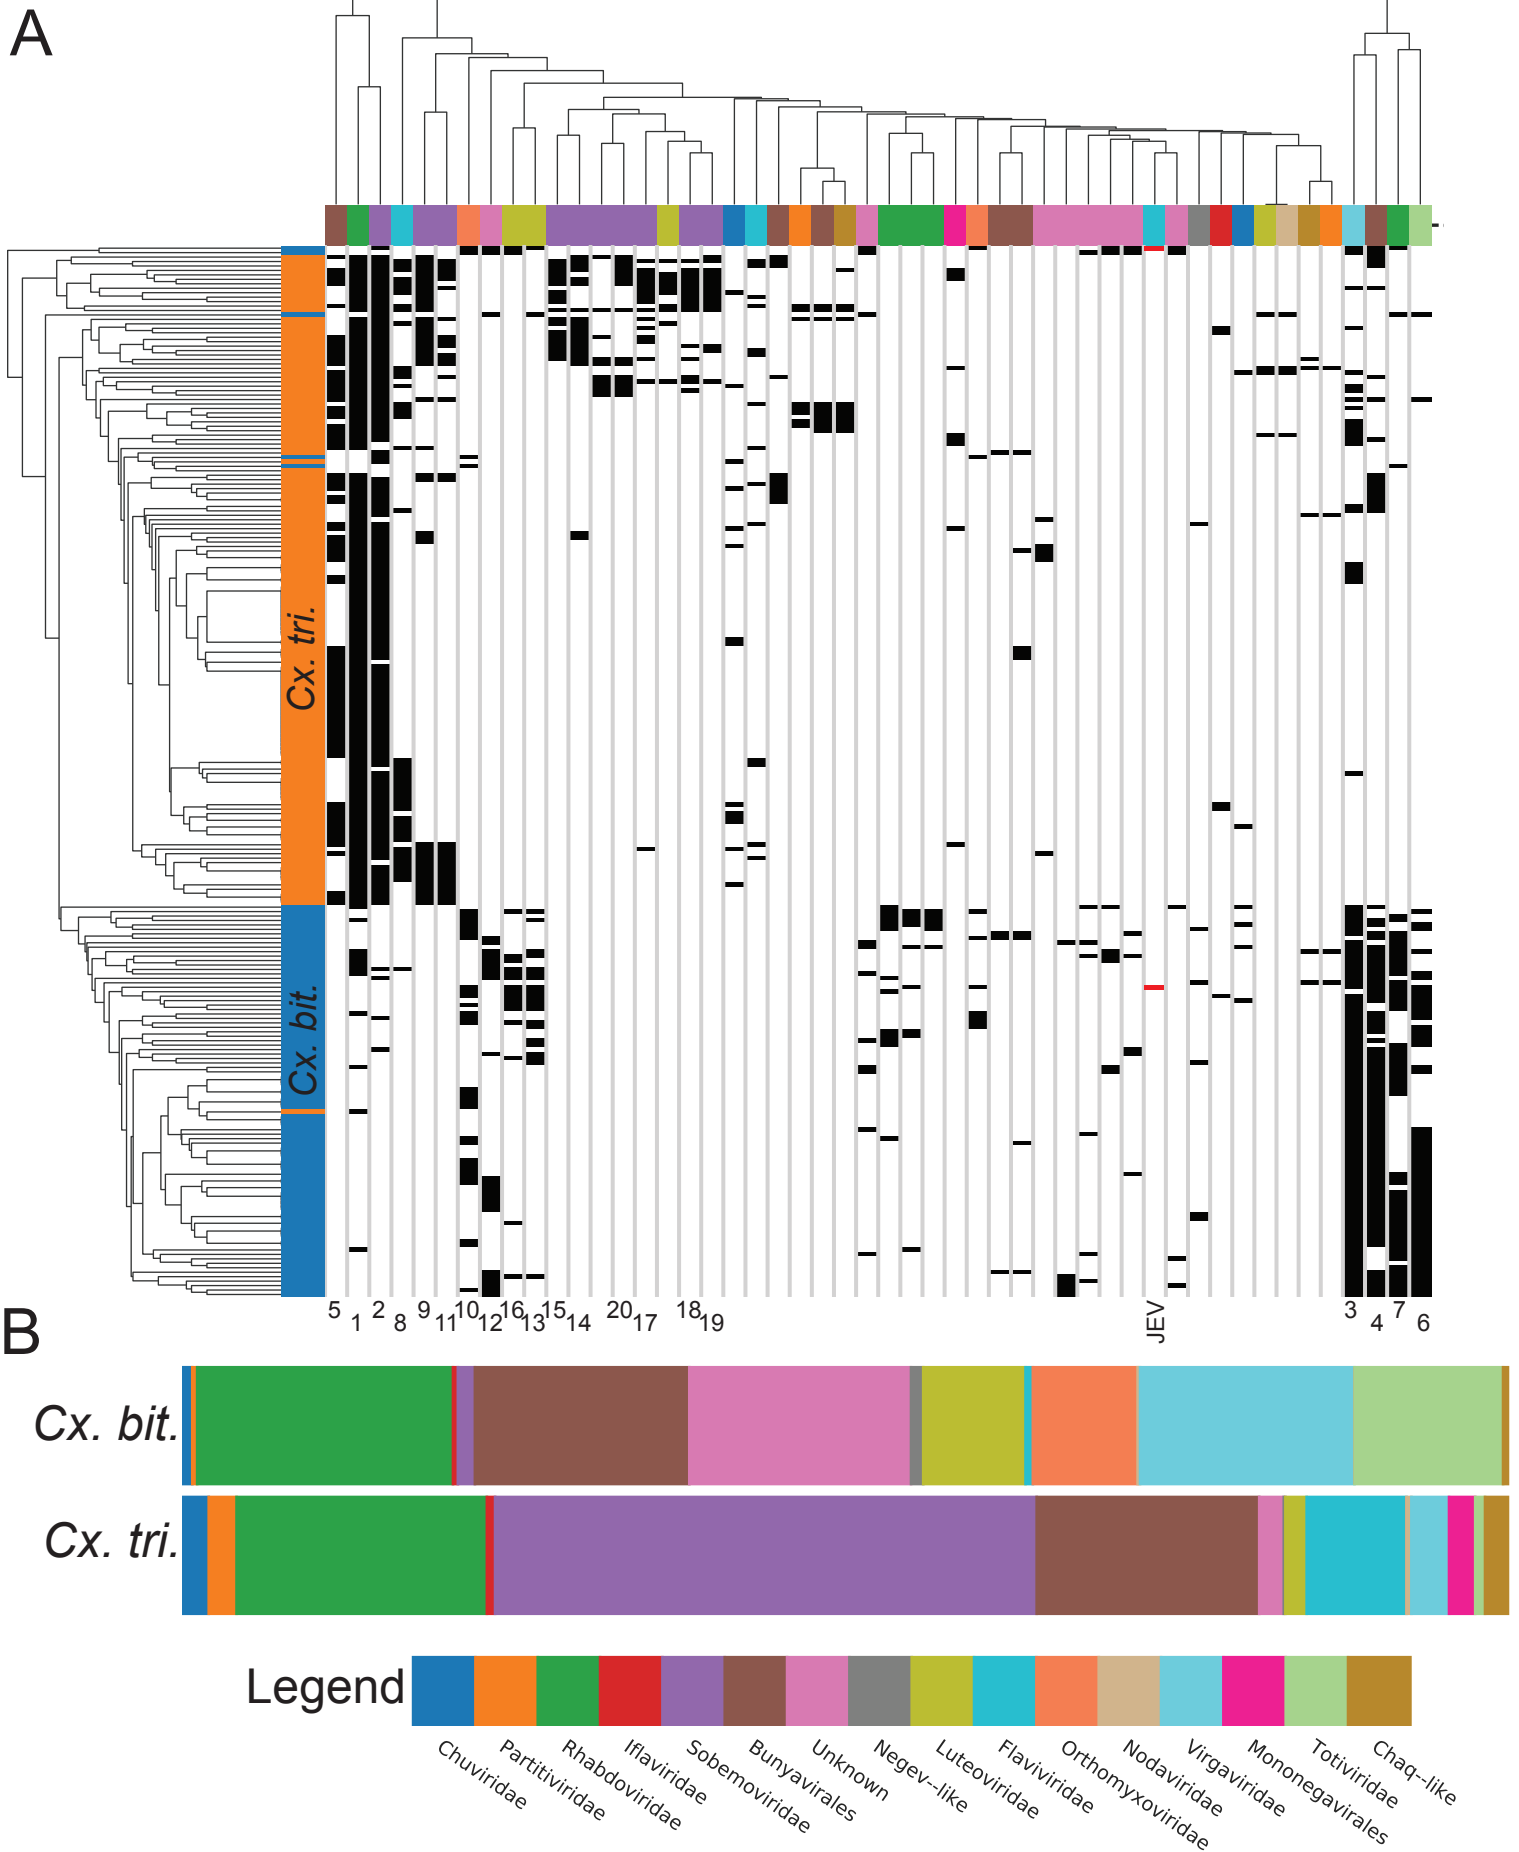

**Figure 2** Clustering and relative abundance of viruses found in the mosquito pools

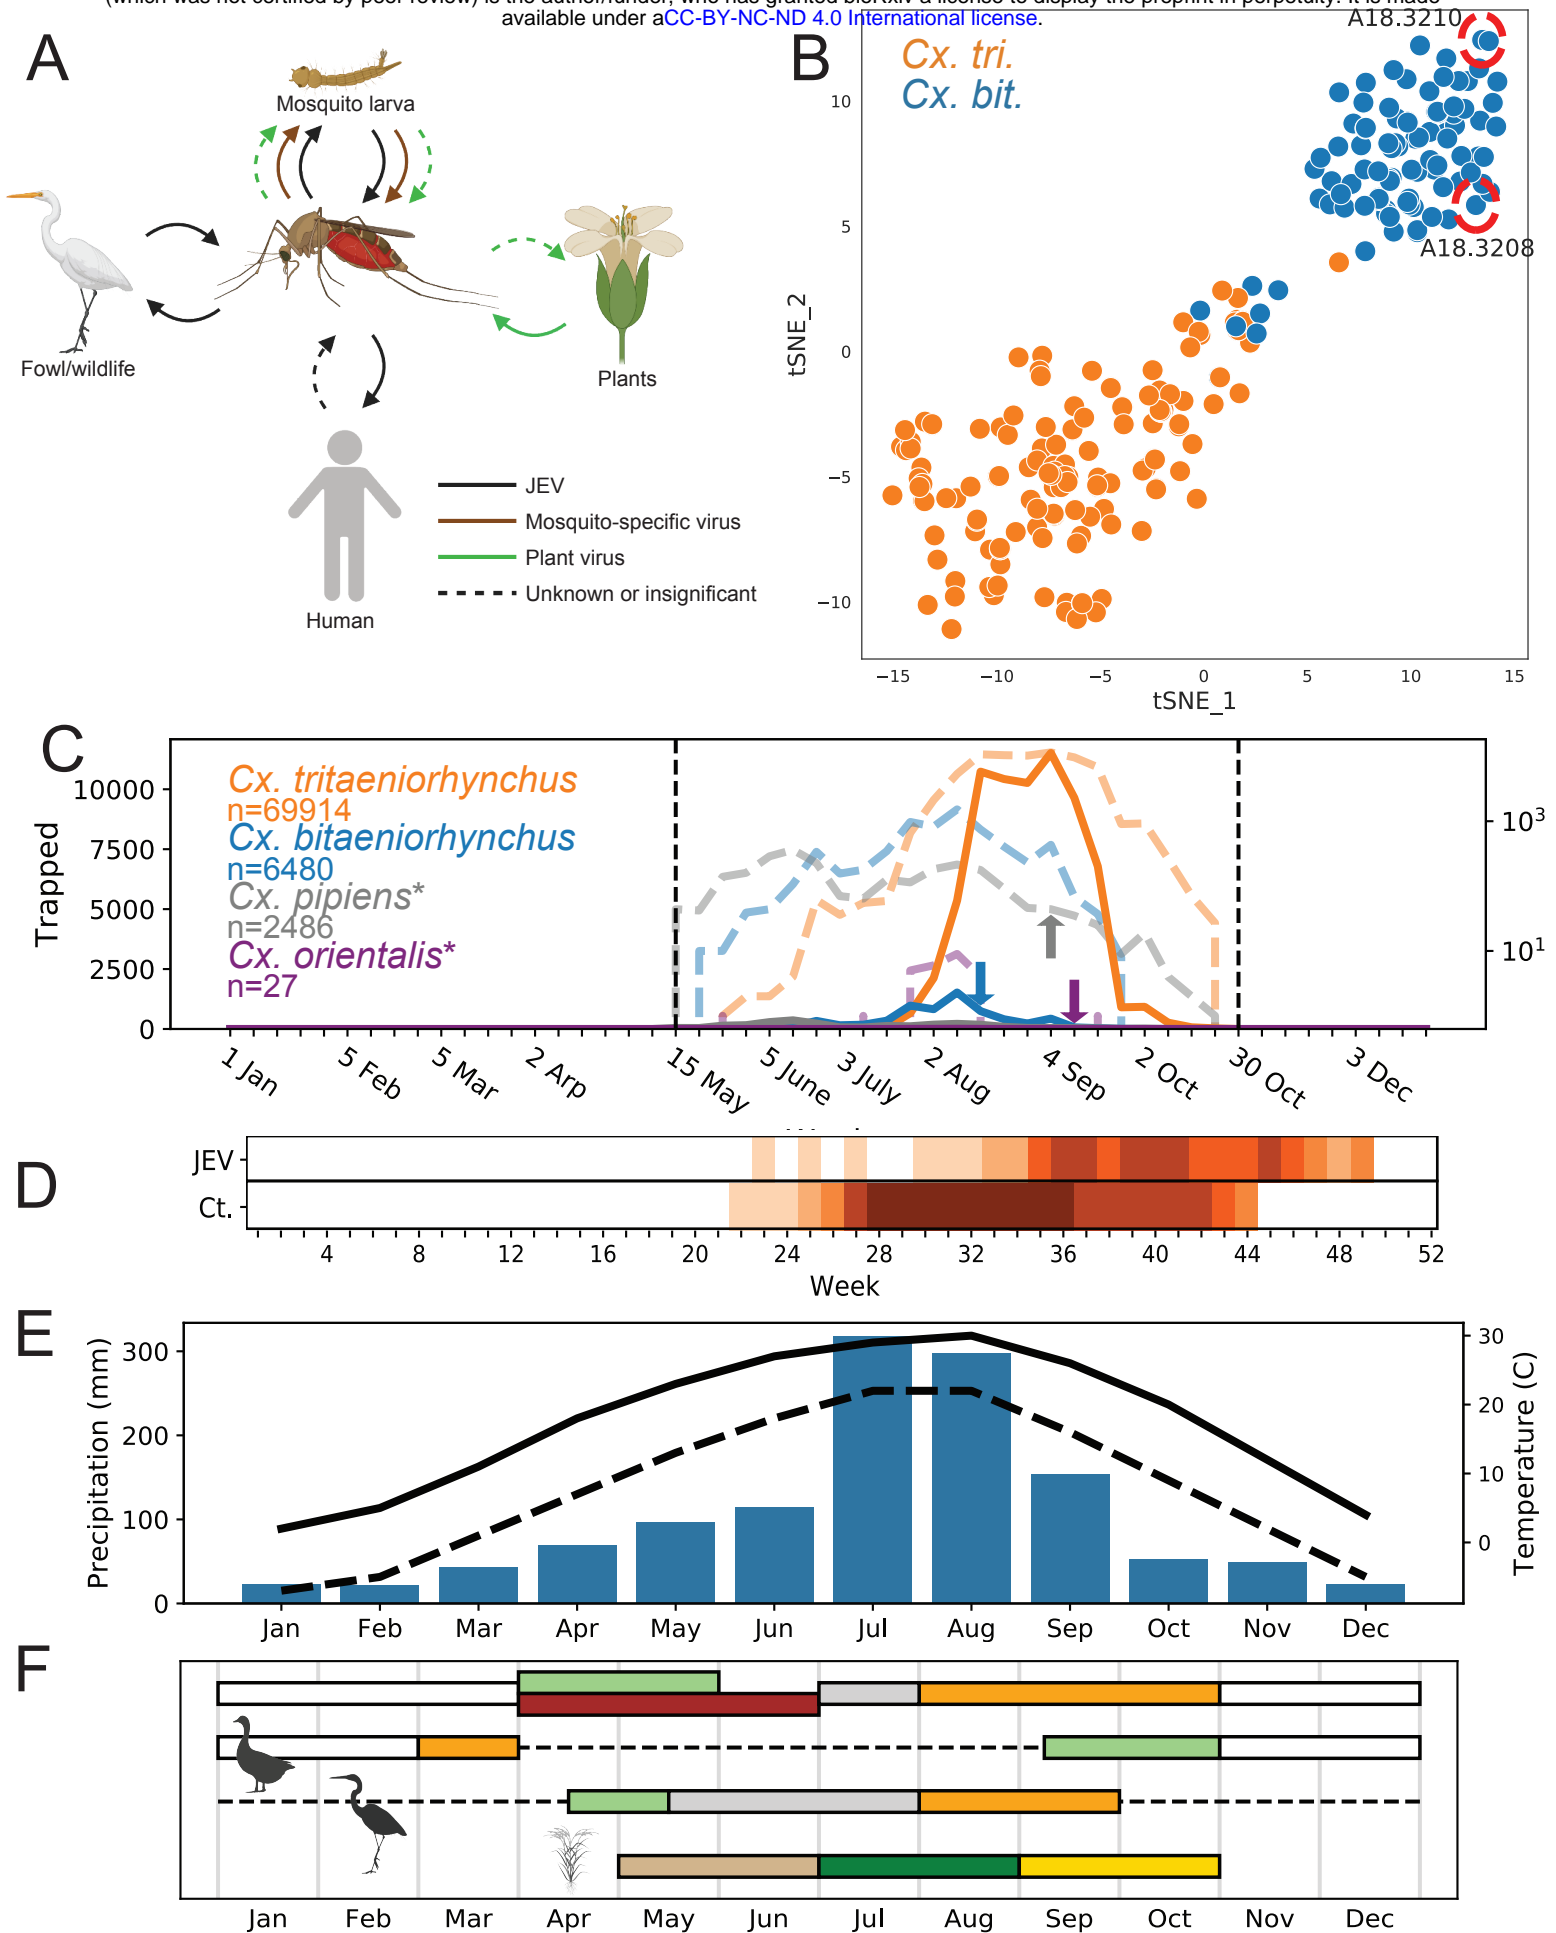

**Figure 3** Ecological and temporal factors of JEV in ROK

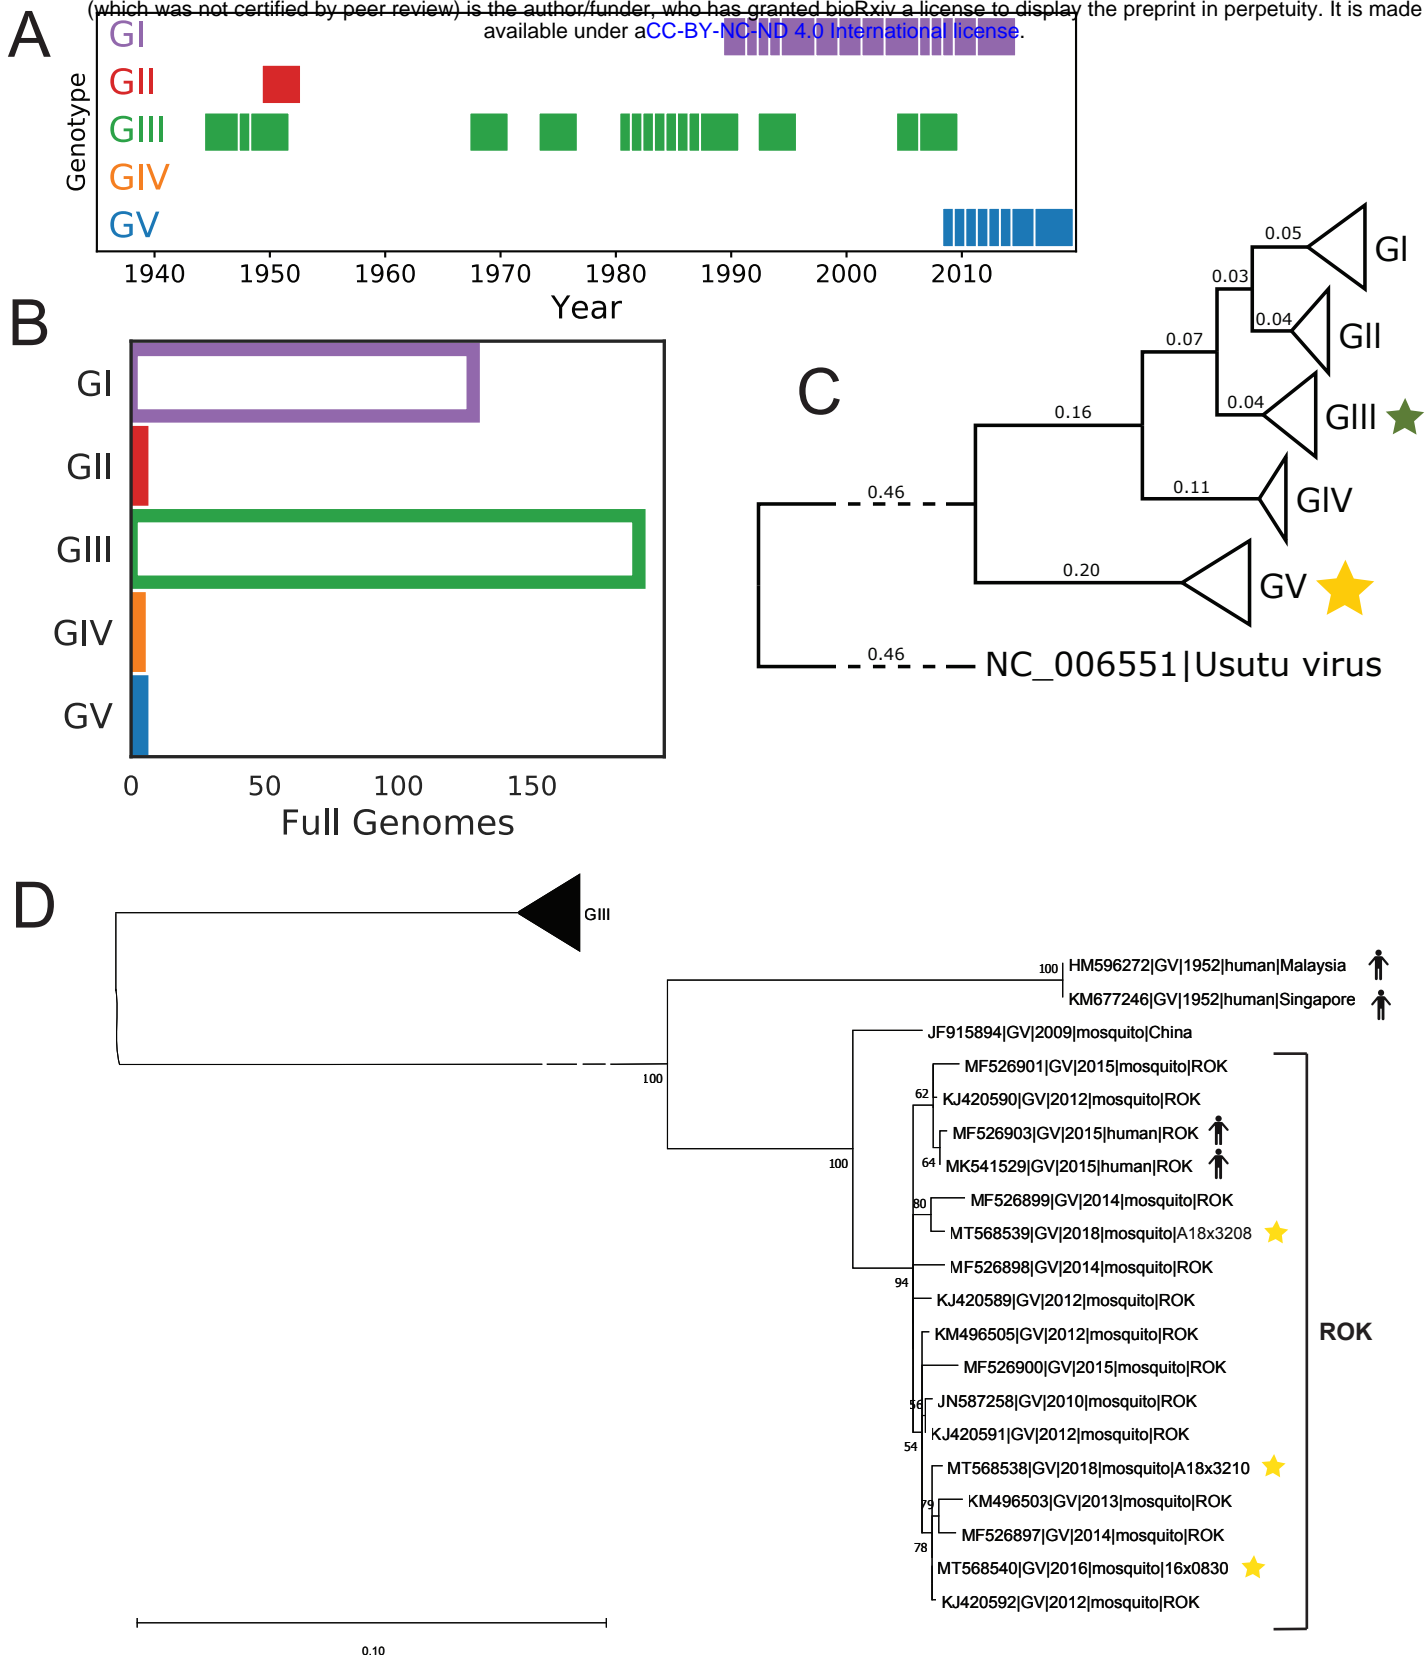

**Figure 4** JEV genotype shift in ROK

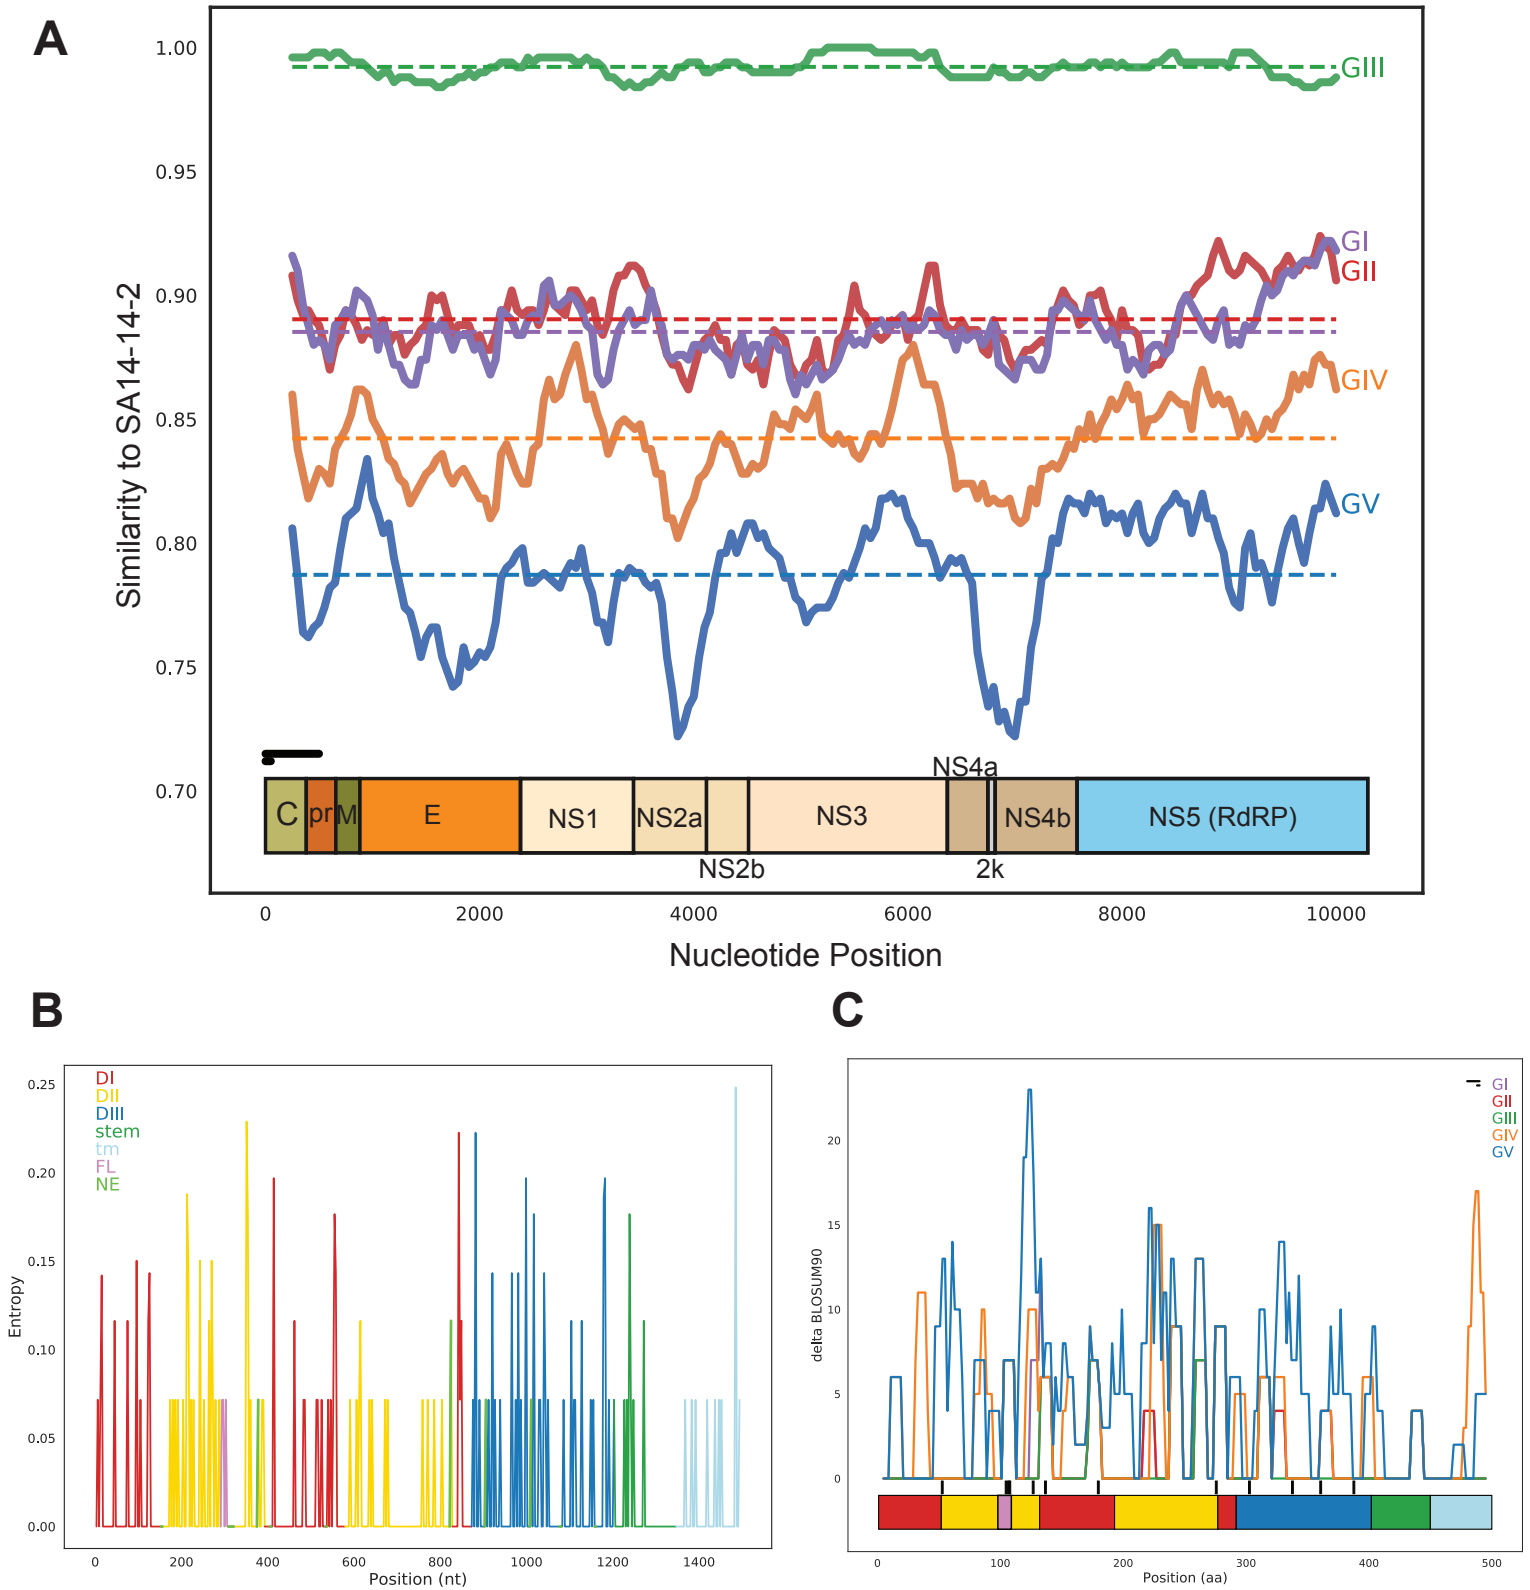

**Figure 5** Dissimilarity of JEV GV and GIII derived vaccine strain SA14-14-2

A

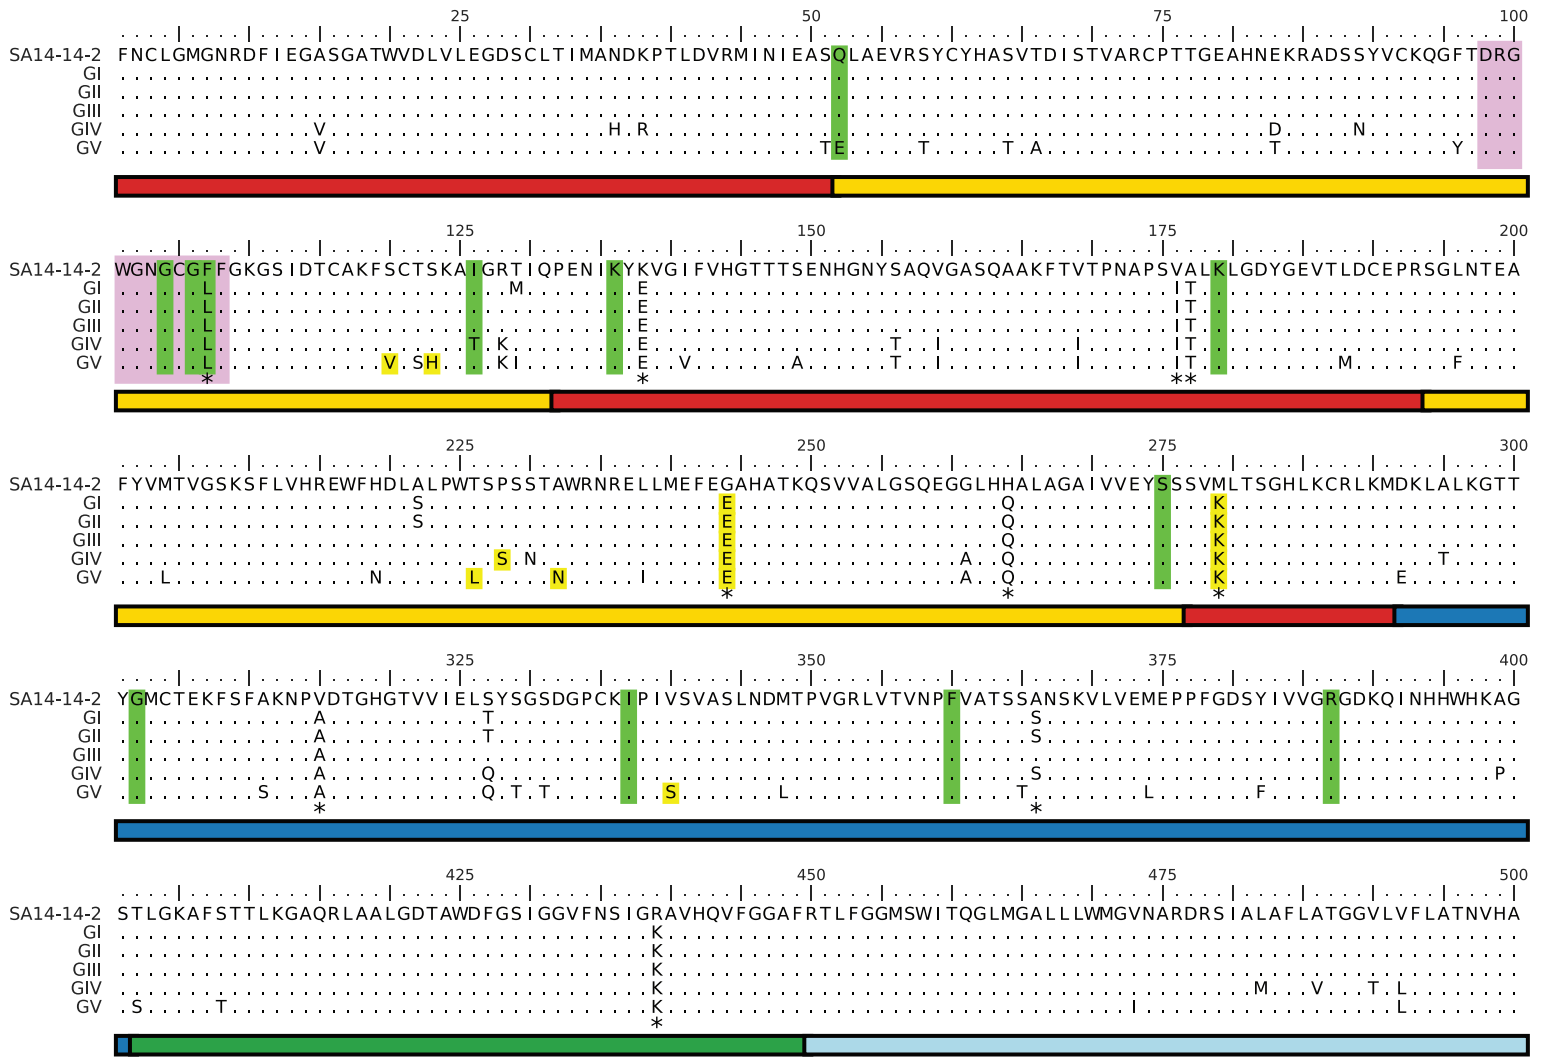

B

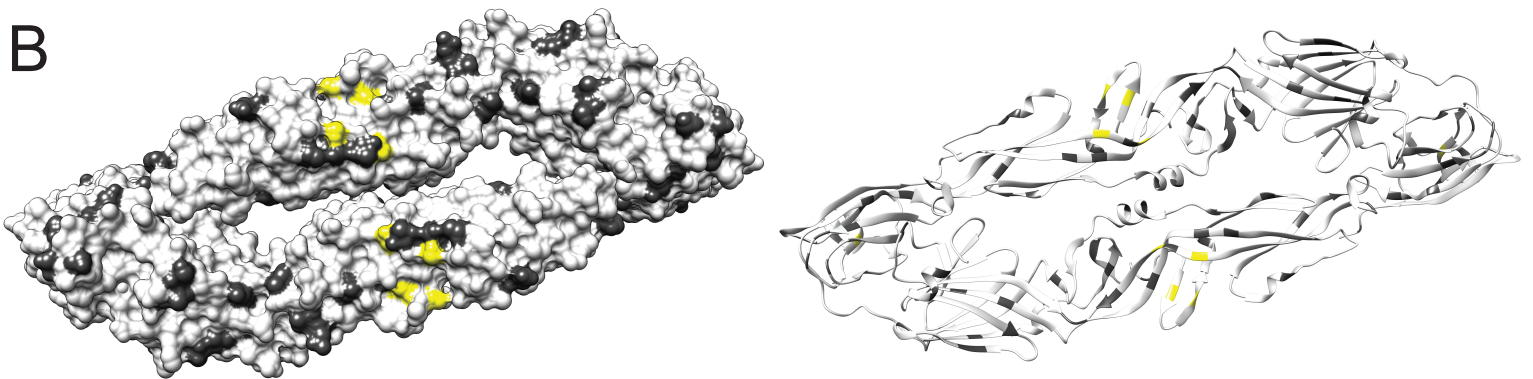

Figure 6 Regions of significant aa divergence in the GV E gene

**A**

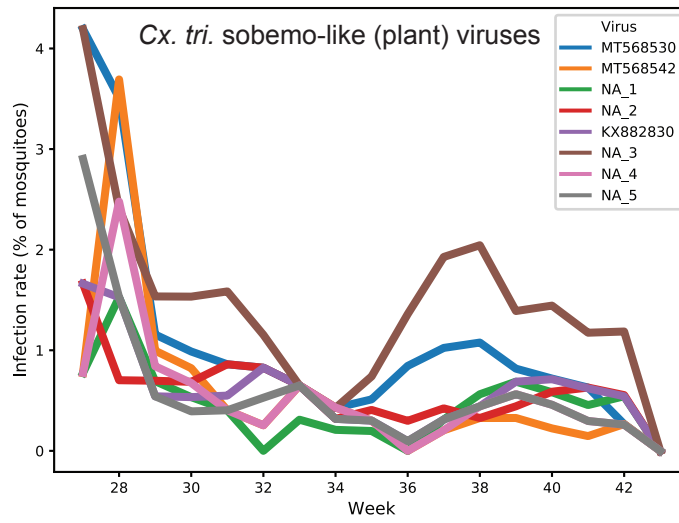

**B**

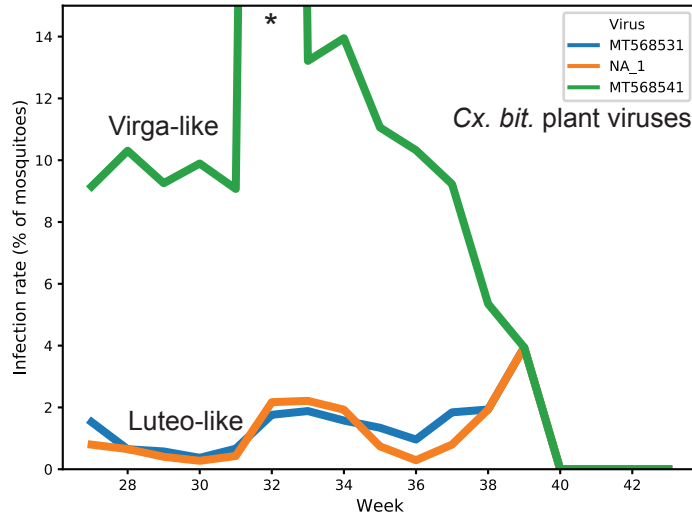

\* Too many infected pools to calculate

**Supplemental Figure 1** Temporal dynamics of plant viruses in mosquitoes
